# Supplementary material for: Extension of the 5-alkynyluridine side chain via C–C-bond formation in modified organometallic nucleosides using the Nicholas reaction
Source: PubMed Central journal article supplement (PMC6964655; doi:10.3762/bjoc.16.1), 2020-01-02

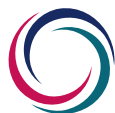

## Supporting Information

for

### **Extension of the 5-alkynyluridine side chain via C–C-bond formation in modified organometallic nucleosides using the Nicholas reaction**

Renata Kaczmarek, Dariusz Korczyński, James R. Green and Roman Dembinski

*Beilstein J. Org. Chem.* **2020**, *16*, 1–8. [doi:10.3762/bjoc.16.1](https://doi.org/10.3762/bjoc.16.1)

### **$^1\text{H}$ and $^{13}\text{C}$ NMR spectra for compounds **2**, **3**, **4**, **5**, **6a–c**, and **7a,b,d****

## Table of Contents

|                                                            |     |
|------------------------------------------------------------|-----|
| $^1\text{H}$ and $^{13}\text{C}$ NMR spectrum of <b>2</b>  | S2  |
| $^1\text{H}$ and $^{13}\text{C}$ NMR spectrum of <b>3</b>  | S4  |
| $^1\text{H}$ and $^{13}\text{C}$ NMR spectrum of <b>4</b>  | S6  |
| $^1\text{H}$ and $^{13}\text{C}$ NMR spectrum of <b>5</b>  | S8  |
| $^1\text{H}$ and $^{13}\text{C}$ NMR spectrum of <b>6a</b> | S10 |
| $^1\text{H}$ and $^{13}\text{C}$ NMR spectrum of <b>6b</b> | S12 |
| $^1\text{H}$ and $^{13}\text{C}$ NMR spectrum of <b>6c</b> | S14 |
| $^1\text{H}$ and $^{13}\text{C}$ NMR spectrum of <b>7a</b> | S16 |
| $^1\text{H}$ and $^{13}\text{C}$ NMR spectrum of <b>7b</b> | S18 |
| $^1\text{H}$ and $^{13}\text{C}$ NMR spectrum of <b>7d</b> | S20 |

<sup>1</sup>H NMR spectrum for 2 (DMSO-d<sub>6</sub>)

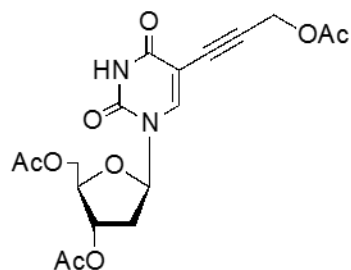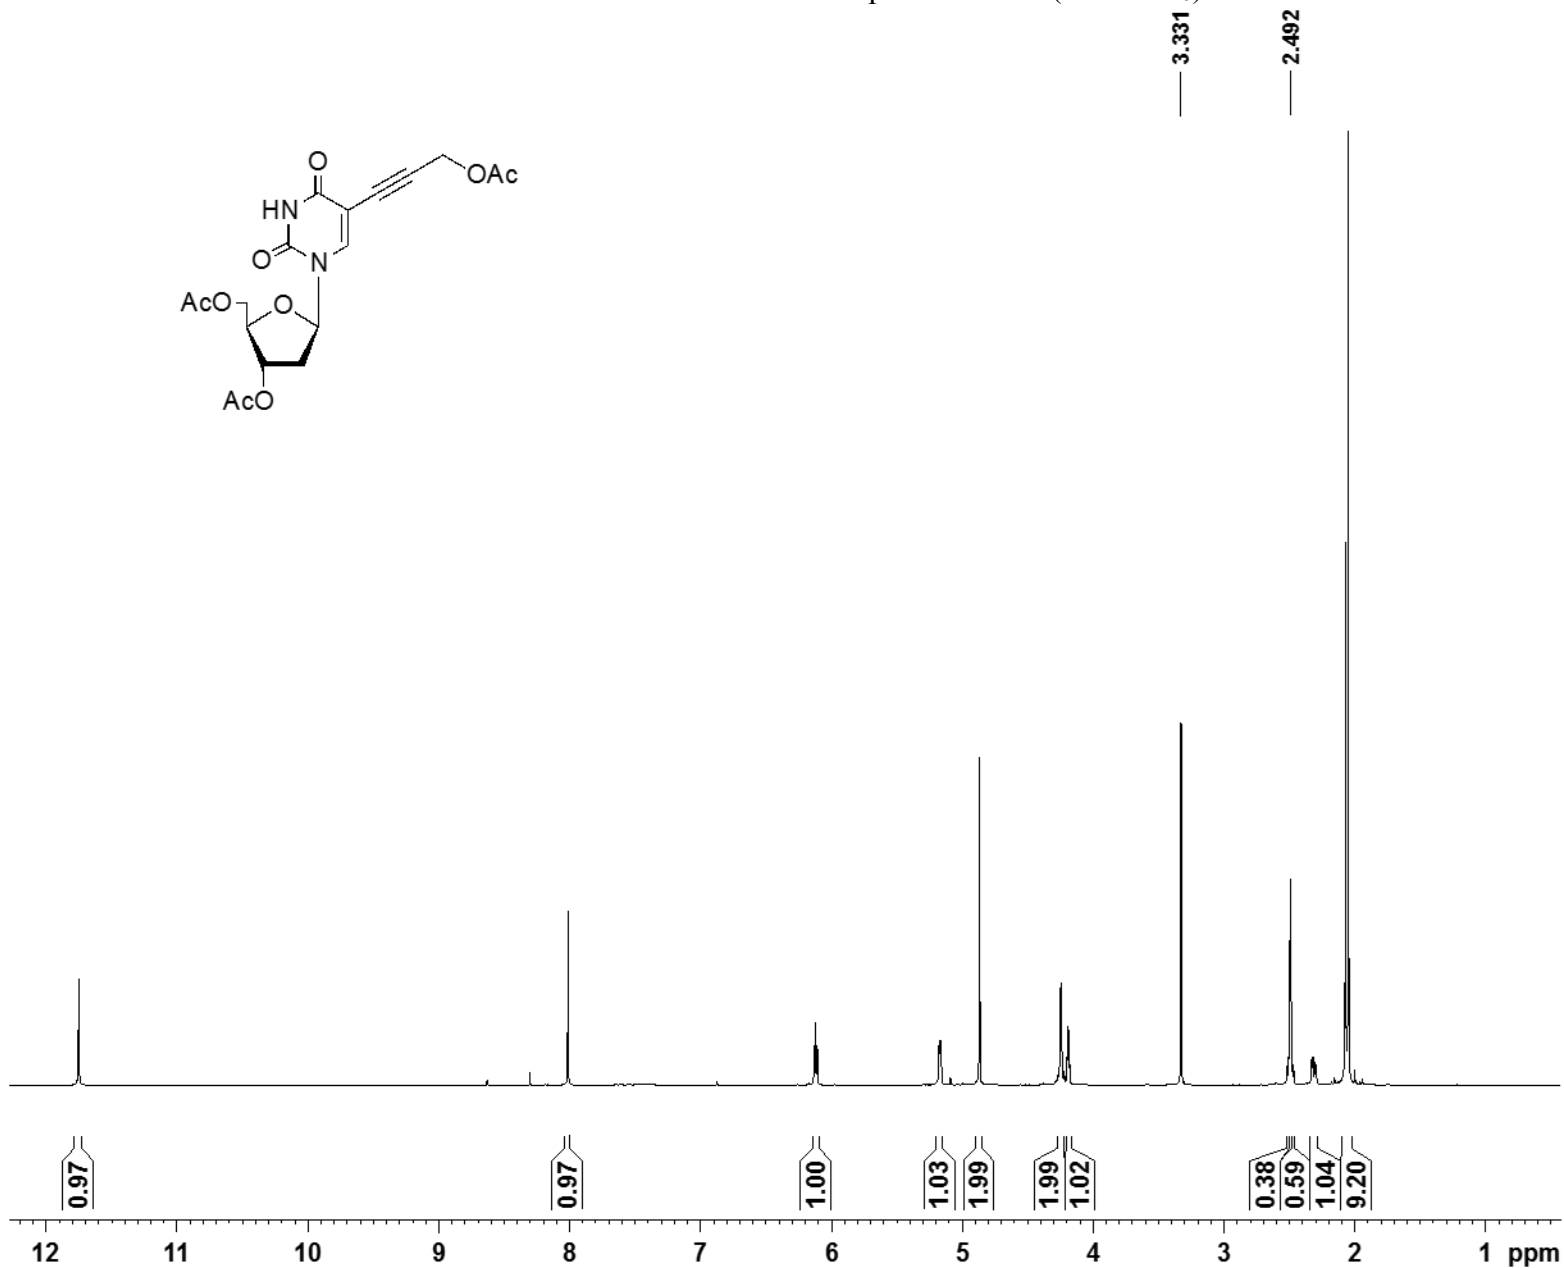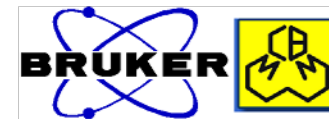

\*\*CBMIM PAN LODZ\*\*

\*\*\*\* NMR LAB \*\*\*\*

\*\*AV III 500 MHz\*\*

Tel.042 6803 307

Current Data Parameters  
DATPATH C:\Bruker\TopSpin3.1\109  
NAME kac12310\_2017\_600  
EXPNO 1  
PROCNO 1

F2 - Acquisition Parameters  
Date\_ 20171023  
Time 11.31  
INSTRUM AV III 600  
PROBHD 5 mm PABBO BB/  
PULPROG zg30  
TD 65536  
SOLVENT DMSO  
NS 64  
DS 0  
SWH 12335.526 Hz  
FIDRES 0.188225 Hz  
AQ 2.6563926 sec  
RG 57  
DW 40.533 usec  
DE 6.50 usec  
TE 294.9 K  
D1 1.00000000 sec  
TD0 1

===== CHANNEL f1 =====  
SFO1 600.1339008 MHz  
NUC1 1H  
P1 11.00 usec  
PLW1 25.00000000 W

F2 - Processing parameters  
SI 65536  
SF 600.1300135 MHz  
WDW EM  
SSB 0  
LB 0.30 Hz  
GB 0  
PC 1.40

<sup>13</sup>C NMR spectrum for 2 (DMSO-d<sub>6</sub>)

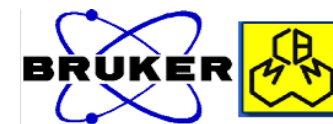

170.103  
170.032  
169.710  
161.295  
149.335  
144.405

97.847  
87.048  
84.903  
81.483  
79.171  
78.516  
73.660

63.529  
52.196  
40.029  
39.910  
39.771  
39.633  
39.494  
39.355  
39.215  
39.076  
36.169  
20.755  
20.542  
20.459

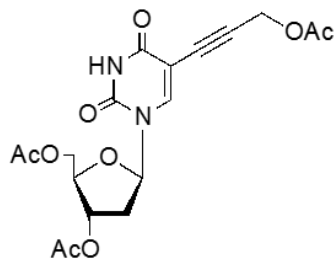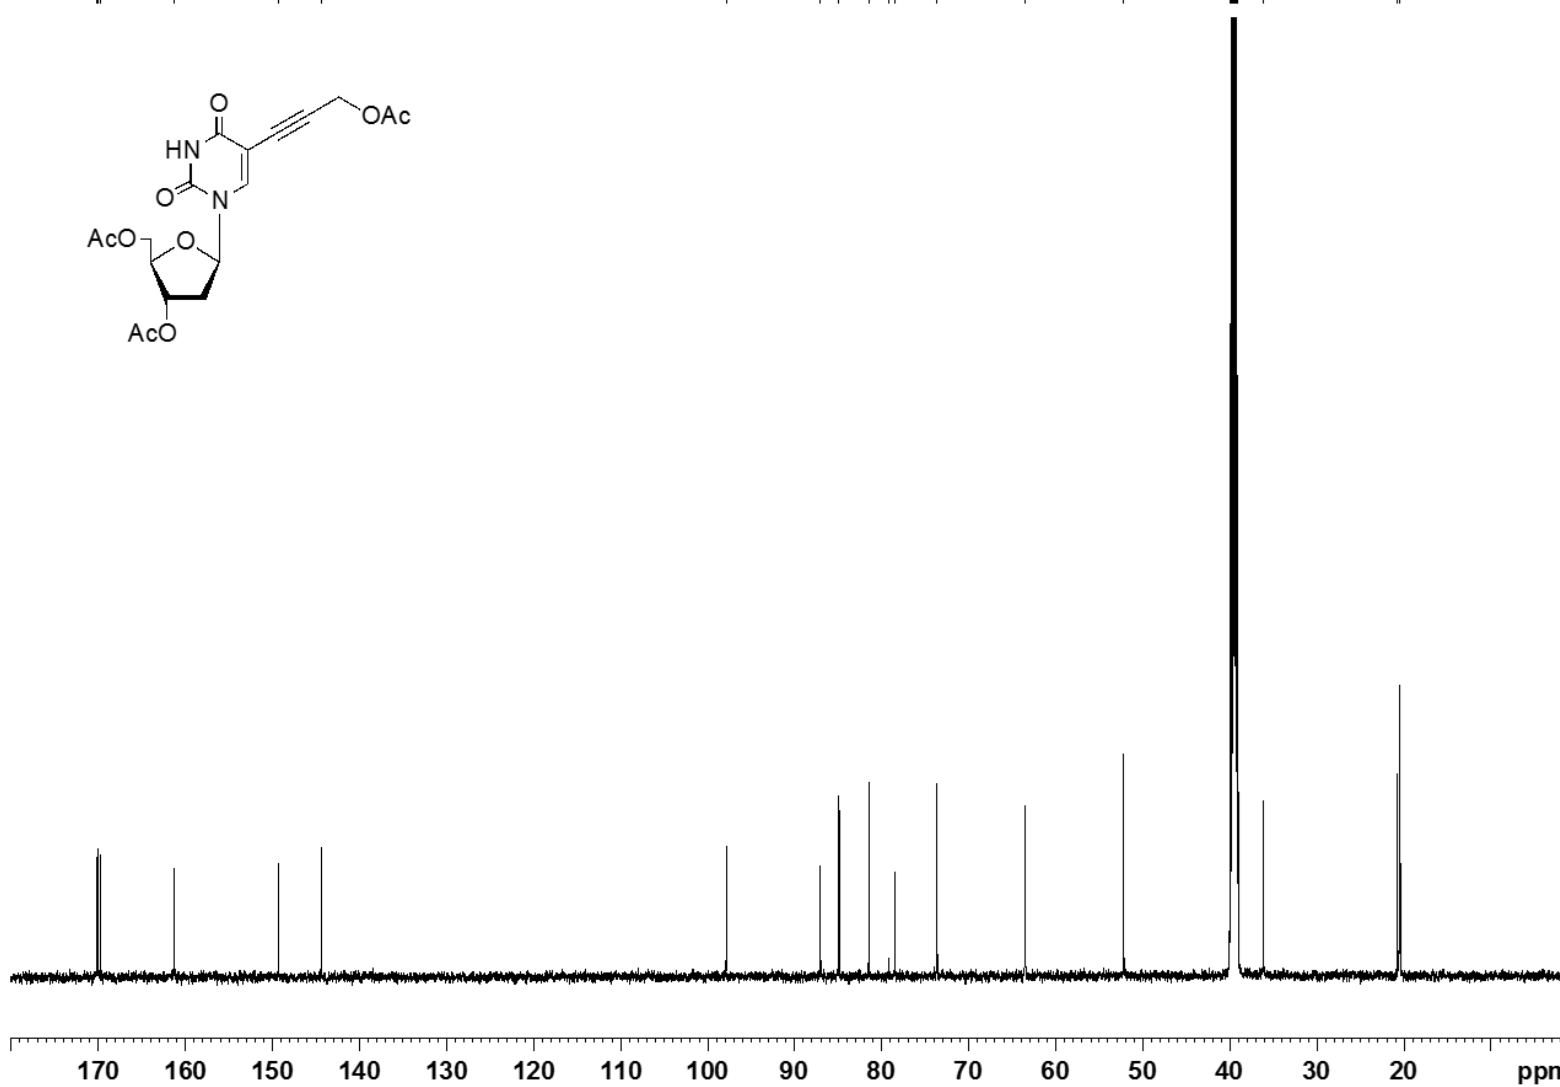

\*\*CBMIM PAN LODZ\*\*  
 \*\*\*\* NMR LAB \*\*\*\*  
 \*\*AV III 500 MHz\*\*  
 Tel:042 6803 307  
 Current Data Parameters  
 DATPATH C:\Bruker\TopSpin3.1\109  
 NAME kac12310\_2017\_600  
 EXPNO 2  
 PROCNO 1  
 F2 - Acquisition Parameters  
 Date\_ 20171023  
 Time 12.04  
 INSTRUM AV III 600  
 PROBHD 5 mm PABBO BB/  
 PULPROG zgpg30  
 TD 65536  
 SOLVENT DMSO  
 NS 755  
 DS 0  
 SWH 42613.637 Hz  
 FIDRES 0.650232 Hz  
 AQ 0.7689557 sec  
 RG 2050  
 DW 11.733 usec  
 DE 6.50 usec  
 TE 295.0 K  
 D1 3.00000000 sec  
 D11 0.03000000 sec  
 TDO 4  
 ===== CHANNEL f1 =====  
 SFO1 150.9194083 MHz  
 NUC1 13C  
 P1 12.00 usec  
 PLW1 98.00000000 W  
 ===== CHANNEL f2 =====  
 SFO2 600.1324005 MHz  
 NUC2 1H  
 CPDPRG[2] waltz16  
 PCPD2 80.00 usec  
 PLW2 25.00000000 W  
 PLW12 0.47266001 W  
 PLW13 0.30250001 W  
 F2 - Processing parameters  
 SI 32768  
 SF 150.9028801 MHz  
 WDW EM  
 SSB 0  
 LB 2.00 Hz  
 GB 0  
 PC 1.40

<sup>1</sup>H NMR spectrum for 3 (CDCl<sub>3</sub>)

7.263

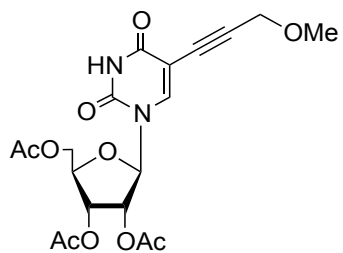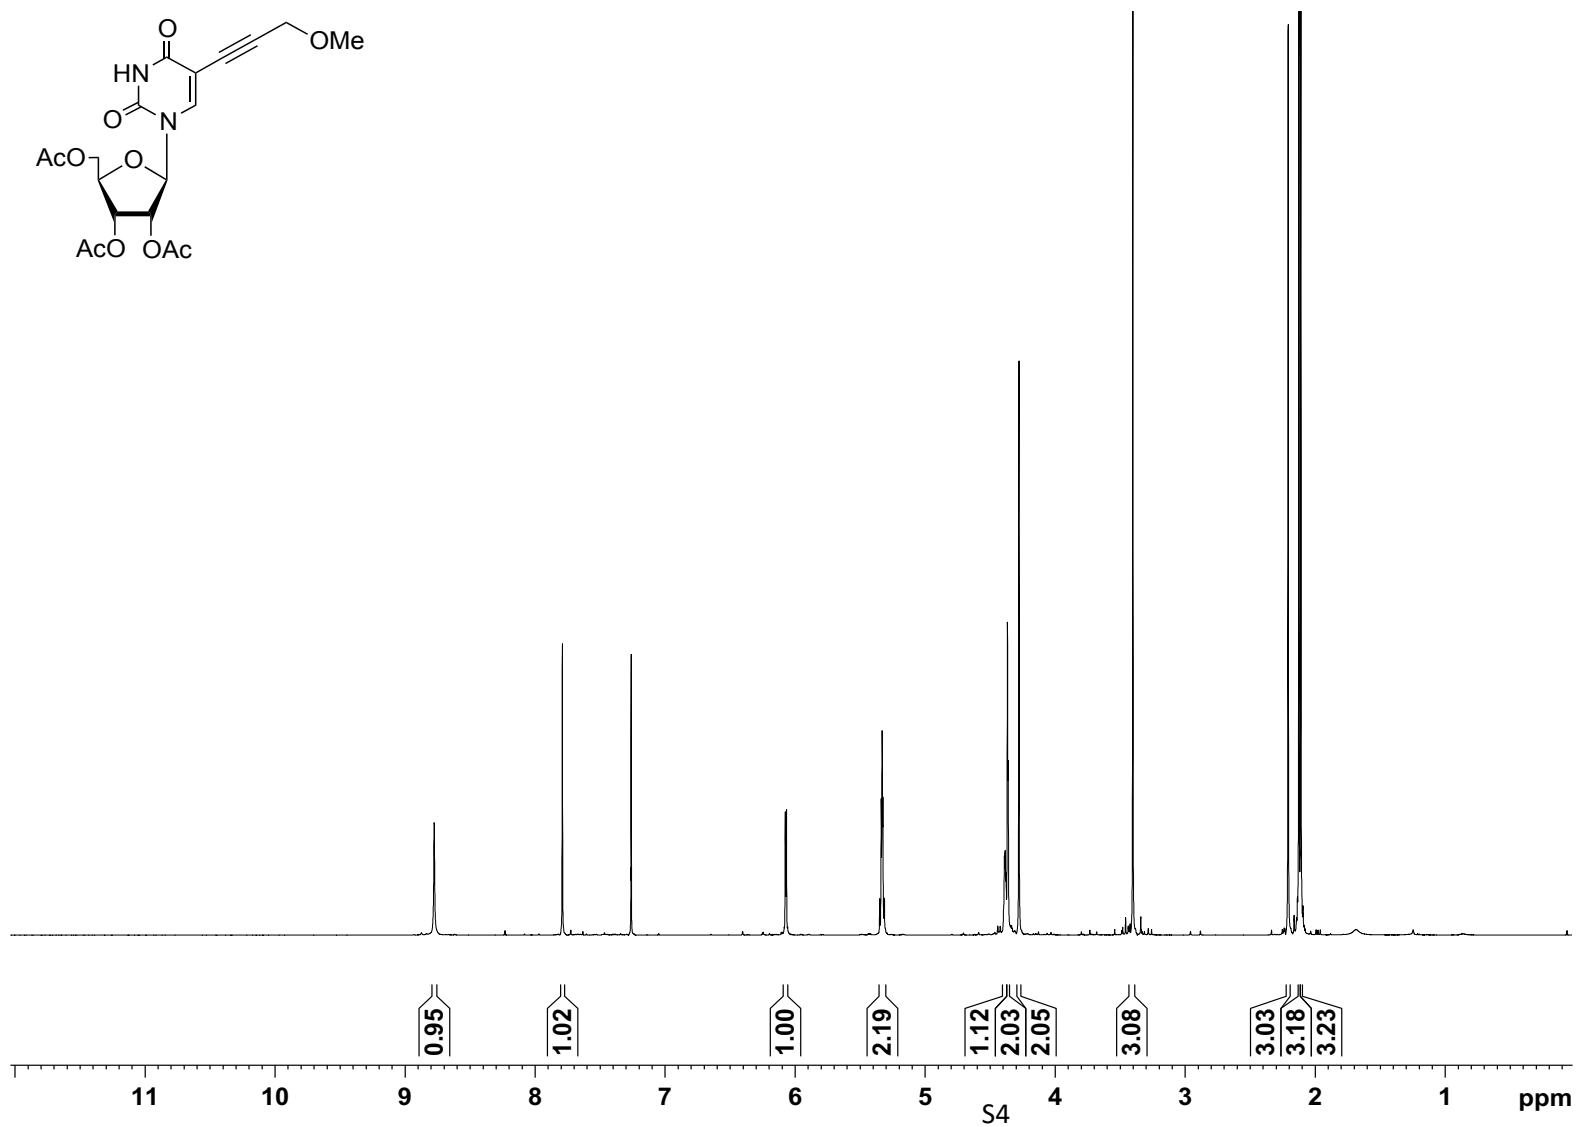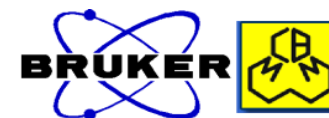

\*\*CBMiM PAN LODZ\*\*

\*\*\*\* NMR LAB \*\*\*\*

\*\*AV III 500 MHz\*\*

Tel:042 6803 307

Current Data Parameters  
DATPATH C:\Bruker\TopSpin3.1\109  
NAME kac10907\_2019\_500  
EXPNO 1  
PROCNO 1

F2 - Acquisition Parameters  
Date\_ 20190709  
Time 10.29  
INSTRUM AV\_III\_500  
PROBHD 5 mm TXI 31P Z  
PULPROG zg30  
TD 65536  
SOLVENT CDCl3  
NS 24  
DS 0  
SWH 12335.526 Hz  
FIDRES 0.188225 Hz  
AQ 2.6563926 sec  
RG 228  
DW 40.533 usec  
DE 6.50 usec  
TE 295.0 K  
D1 1.0000000 sec  
TD0 1

===== CHANNEL f1 =====  
SFO1 500.1330008 MHz  
NUC1 1H  
P1 9.66 usec  
PLW1 9.19999981 W

F2 - Processing parameters  
SI 65536  
SF 500.1300236 MHz  
WDW EM  
SSB 0  
LB 0.30 Hz  
GB 0  
PC 1.00

<sup>13</sup>C NMR spectrum for **3** (CDCl<sub>3</sub>)

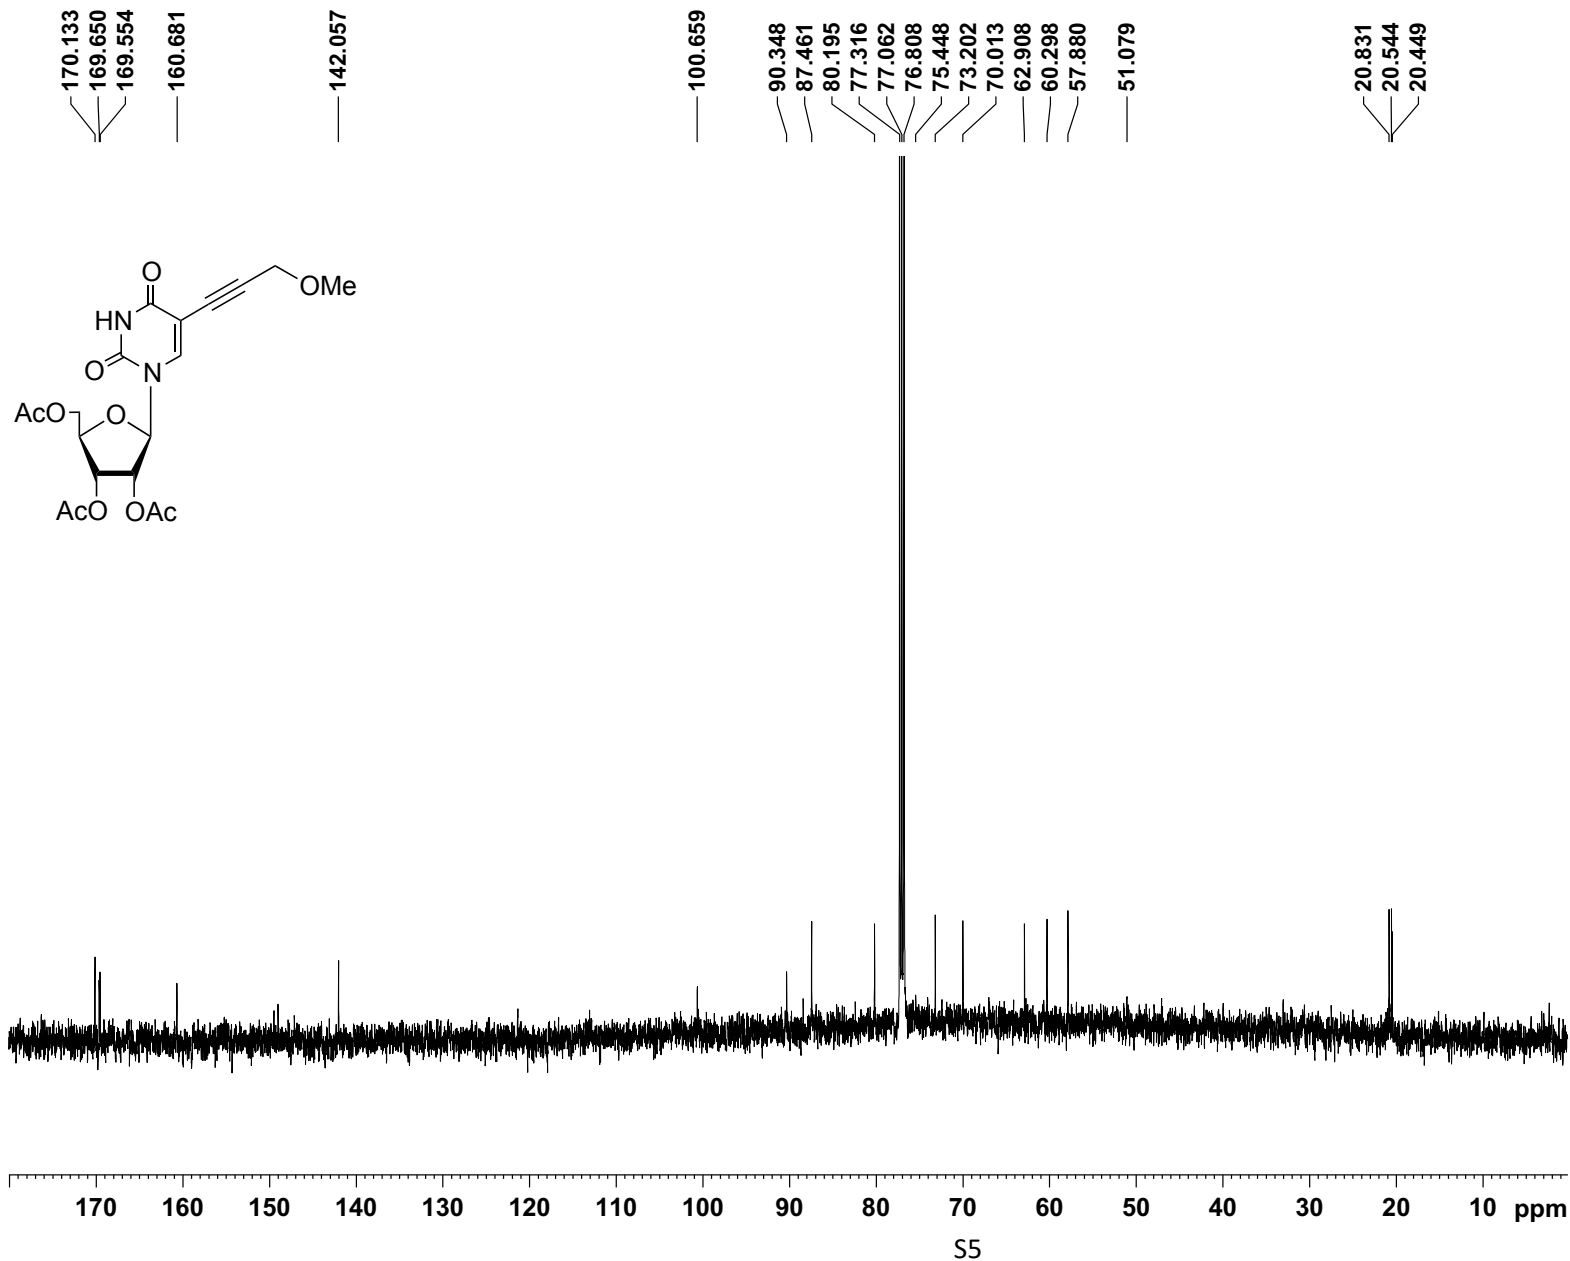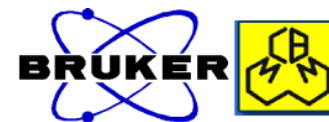

\*\*CBMIM PAN LODZ\*\*

\*\*\*\* NMR LAB \*\*\*\*

\*\*AV III 500 MHz\*\*

Tel:042 6803 307

Current Data Parameters  
 DATPATH C:\Bruker\TopSpin3.1\109  
 NAME kac10907\_2019\_500  
 EXPNO 2  
 PROCNO 1

F2 - Acquisition Parameters  
 Date\_ 20190709  
 Time 10.55  
 INSTRUM AV III 500  
 PROBHD 5 mm TXI 31P Z  
 PULPROG zgpg30  
 TD 65536  
 SOLVENT CDCl3  
 NS 512  
 DS 0  
 SWH 36057.691 Hz  
 FIDRES 0.550197 Hz  
 AQ 0.9087659 sec  
 RG 2050  
 DW 13.867 usec  
 DE 6.50 usec  
 TE 295.0 K  
 D1 2.00000000 sec  
 D11 0.03000000 sec  
 TD0 1

===== CHANNEL f1 =====  
 SFO1 125.7728788 MHz  
 NUC1 13C  
 P1 11.50 usec  
 PLW1 226.0000000 W

===== CHANNEL f2 =====  
 SFO2 500.1324005 MHz  
 NUC2 1H  
 CPDPRG[2] waltz16  
 PCPD2 100.00 usec  
 PLW2 9.00000000 W  
 PLW12 0.08398400 W  
 PLW13 0.08398400 W

F2 - Processing parameters  
 SI 32768  
 SF 125.7577890 MHz  
 WDW EM  
 SSB 0  
 LB 2.00 Hz  
 GB 0  
 PC 1.40



<sup>13</sup>C NMR spectrum for 4 (CDCl<sub>3</sub>)

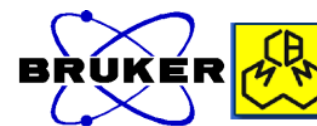

\*\*CBMiM PAN LODZ\*\*

\*\*\*\* NMR LAB \*\*\*\*

\*\*AV III 500 MHz\*\*

Tel:042 6803 307

Current Data Parameters  
DATPATH C:\Bruker\TopSpin3.1\109  
NAME kac12510\_2017\_600  
EXPNO 2  
PROCNO 1

F2 - Acquisition Parameters  
Date\_ 20171025  
Time 11.58  
INSTRUM AV III 600  
PROBHD 5 mm PABBO BB/  
PULPROG zgpg30  
TD 65536  
SOLVENT CDCl3  
NS 633  
DS 0  
SWH 42613.637 Hz  
FIDRES 0.650232 Hz  
AQ 0.7689557 sec  
RG 2050  
DW 11.733 usec  
DE 6.50 usec  
TE 295.1 K  
D1 3.00000000 sec  
D11 0.03000000 sec  
TD0 2

===== CHANNEL f1 =====  
SFO1 150.9194083 MHz  
NUC1 13C  
P1 12.00 usec  
PLW1 98.00000000 W

===== CHANNEL f2 =====  
SFO2 600.1324005 MHz  
NUC2 1H  
CPDPRG[2] waltz16  
PCPD2 80.00 usec  
PLW2 25.00000000 W  
PLW12 0.47266001 W  
PLW13 0.30250001 W

F2 - Processing parameters  
SI 32768  
SF 150.9028155 MHz  
WDW EM  
SSB 0  
LB 2.00 Hz  
GB 0  
PC 1.40

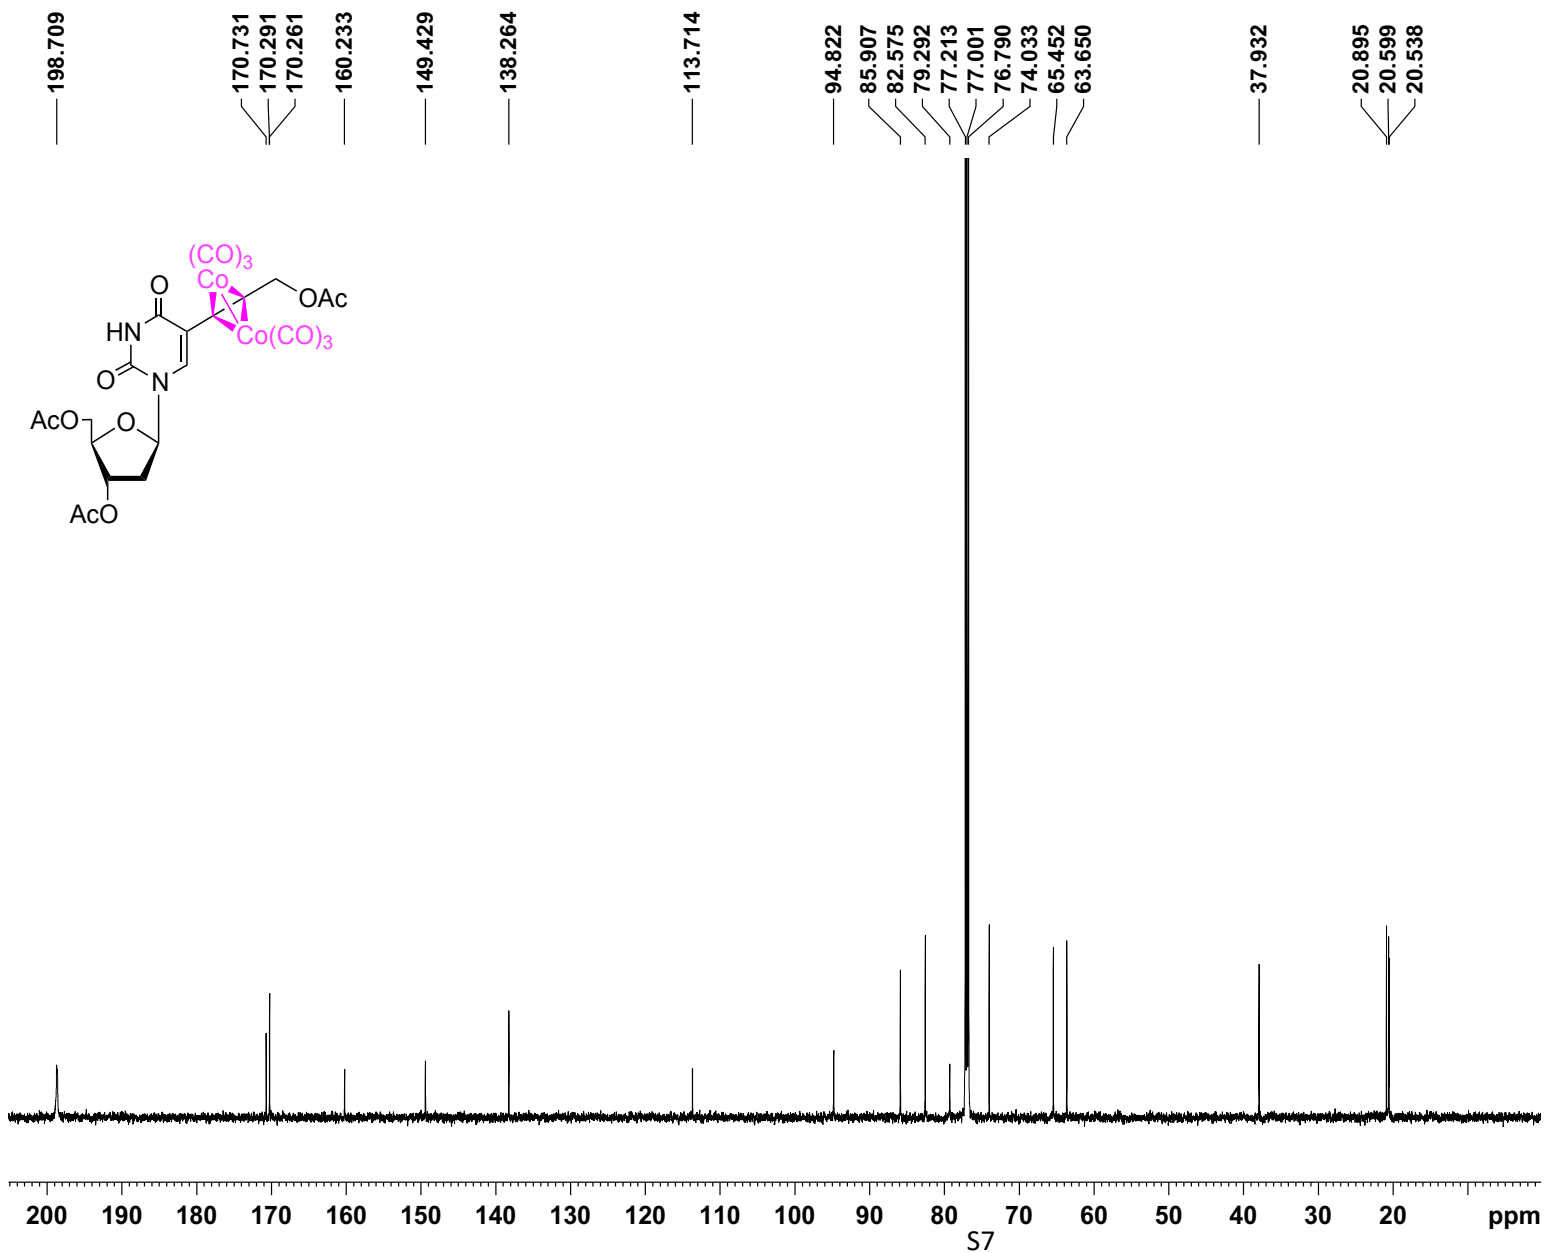



$^1\text{H}$  NMR spectrum for **5** ( $\text{CDCl}_3$ )

— 7.266

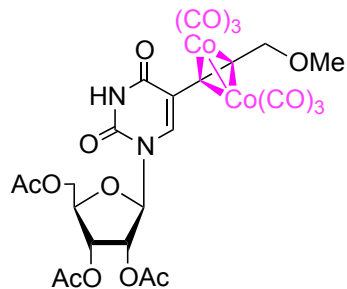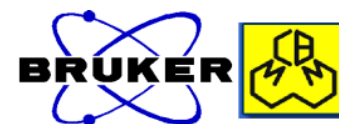

\*\*CBMim PAN LODZ\*\*

\*\*\*\* NMR LAB \*\*\*\*

\*\*AV III 500 MHz\*\*

Tel:042 6803 307

Current Data Parameters  
DATPATH C:\Bruker\TopSpin3.1\109  
NAME kac10907\_2019\_500  
EXPNO 3  
PROCNO 1

F2 - Acquisition Parameters  
Date\_ 20190709  
Time 10.58  
INSTRUM AV III 500  
PROBHD 5 mm TXI 31P Z  
PULPROG zg30  
TD 65536  
SOLVENT  $\text{CDCl}_3$   
NS 24  
DS 0  
SWH 12335.526 Hz  
FIDRES 0.188225 Hz  
AQ 2.6563926 sec  
RG 114  
DW 40.533 usec  
DE 6.50 usec  
TE 295.0 K  
D1 1.00000000 sec  
TD0 1

===== CHANNEL f1 =====  
SFO1 500.1330008 MHz  
NUC1  $^1\text{H}$   
P1 9.66 usec  
PLW1 9.19999981 W

F2 - Processing parameters  
SI 65536  
SF 500.1300236 MHz  
WDW EM  
SSB 0  
LB 0.30 Hz  
GB 0  
PC 1.00

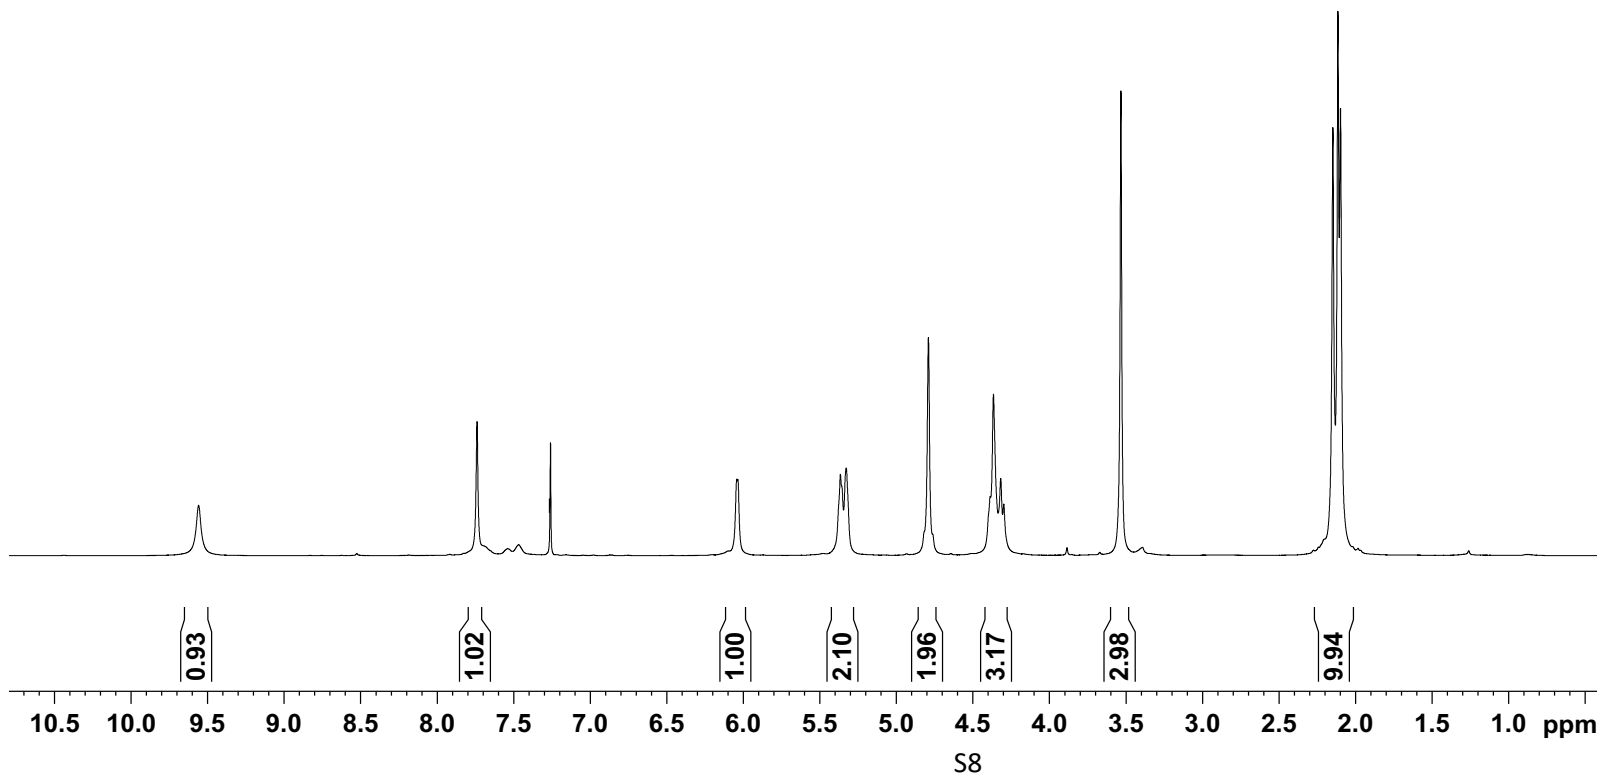

<sup>13</sup>C NMR spectrum for **5** (CDCl<sub>3</sub>)

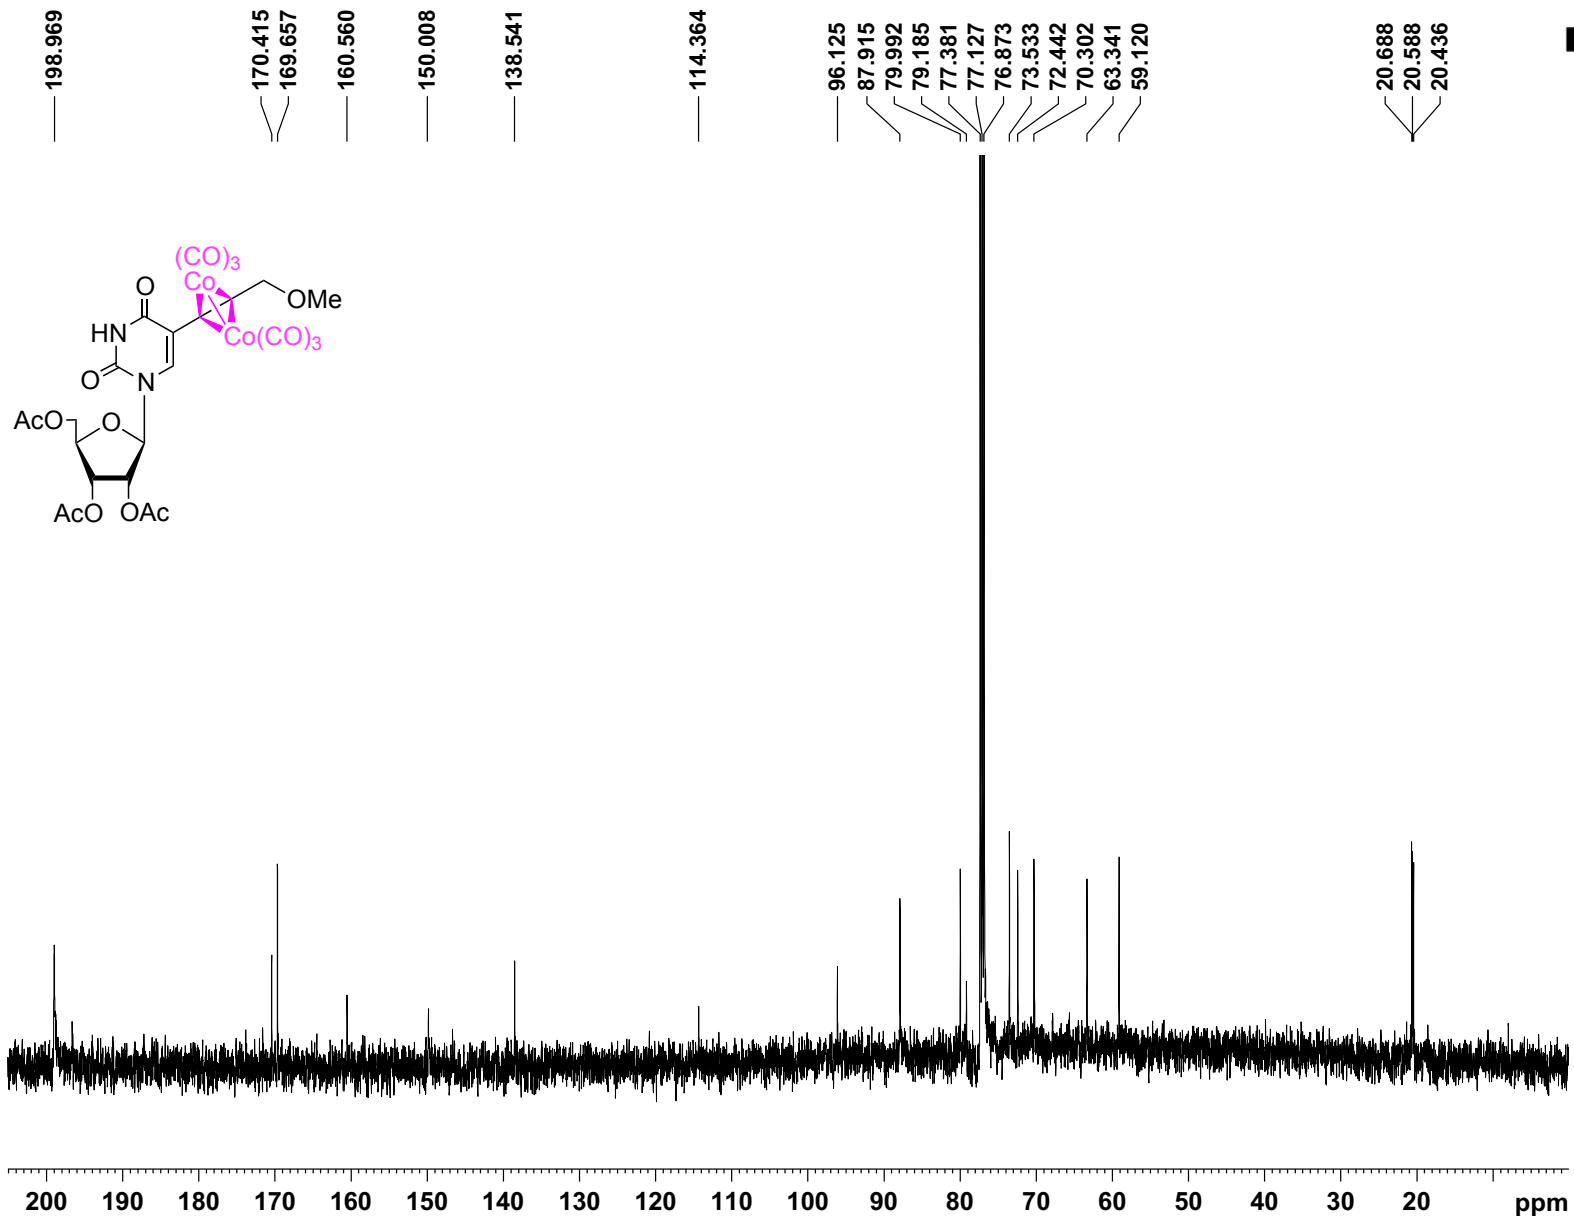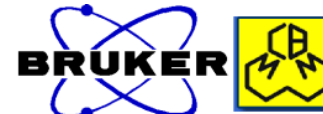

\*\*CBMIM PAN LODZ\*\*

\*\*\*\* NMR LAB \*\*\*\*

\*\*AV III 500 MHz\*\*

Tel:042 6803 307

Current Data Parameters  
 DATPATH C:\Bruker\TopSpin3.1\109  
 NAME kac10907\_2019\_500  
 EXPNO 4  
 PROCNO 1

F2 - Acquisition Parameters

Date\_ 20190709  
 Time 11.07  
 INSTRUM AV III 500  
 PROBHD 5 mm TXI 31P Z  
 PULPROG zgpg30  
 TD 65536  
 SOLVENT CDCl3  
 NS 512  
 DS 0  
 SWH 36057.691 Hz  
 FIDRES 0.550197 Hz  
 AQ 0.9087659 sec  
 RG 2050  
 DW 13.867 usec  
 DE 6.50 usec  
 TE 295.0 K  
 D1 2.00000000 sec  
 D11 0.03000000 sec  
 TD0 1

===== CHANNEL f1 =====

SFO1 125.7728788 MHz  
 NUC1 13C  
 P1 11.50 usec  
 PLW1 226.0000000 W

===== CHANNEL f2 =====

SFO2 500.1324005 MHz  
 NUC2 1H  
 CPDPRG[2] waltz16  
 PCPD2 100.00 usec  
 PLW2 9.00000000 W  
 PLW12 0.08398400 W  
 PLW13 0.08398400 W

F2 - Processing parameters

SI 32768  
 SF 125.7577890 MHz  
 WDW EM  
 SSB 0  
 LB 2.00 Hz  
 GB 0  
 PC 1.40

<sup>1</sup>H NMR spectrum for **6a** (CDCl<sub>3</sub>)

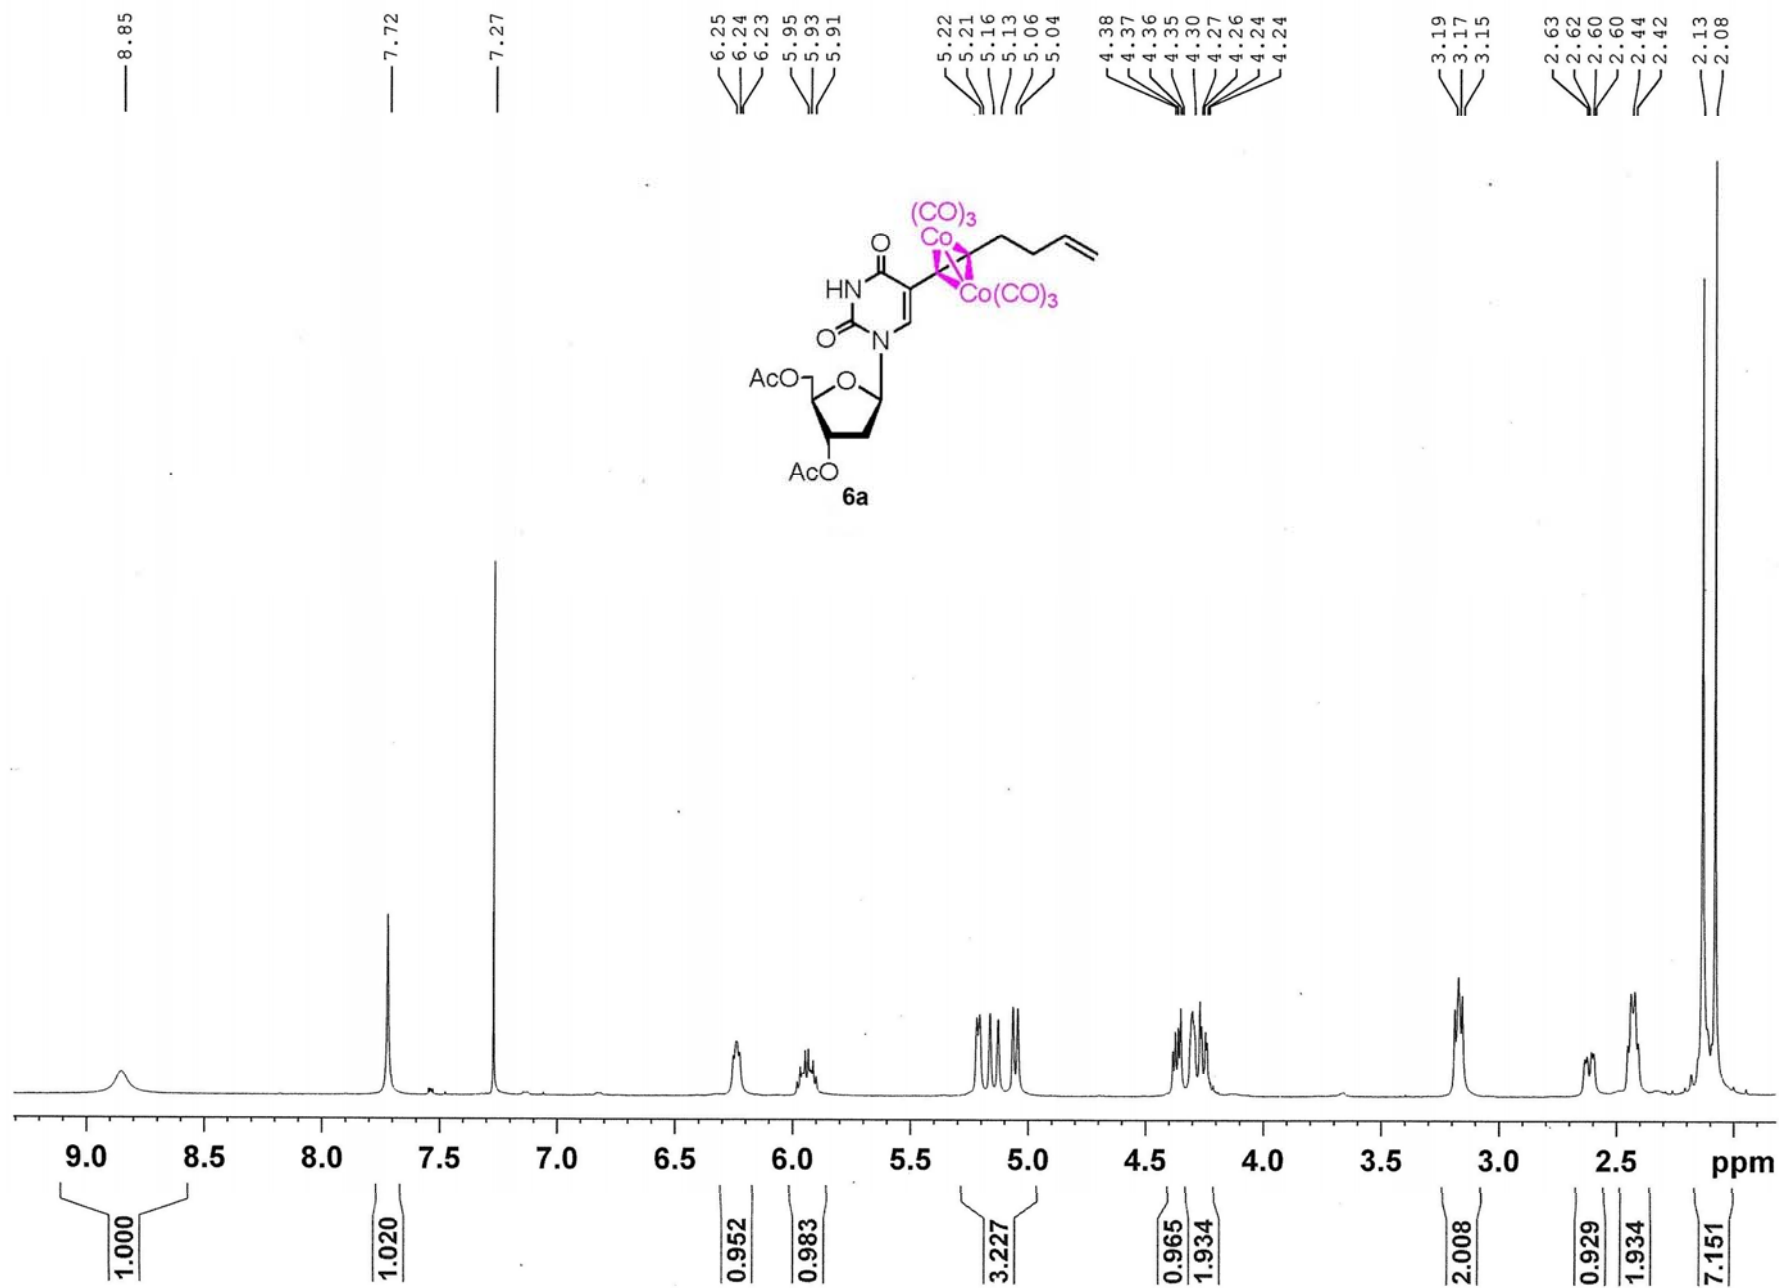

$^{13}\text{C}$  NMR spectrum for **6a** ( $\text{CDCl}_3$ )

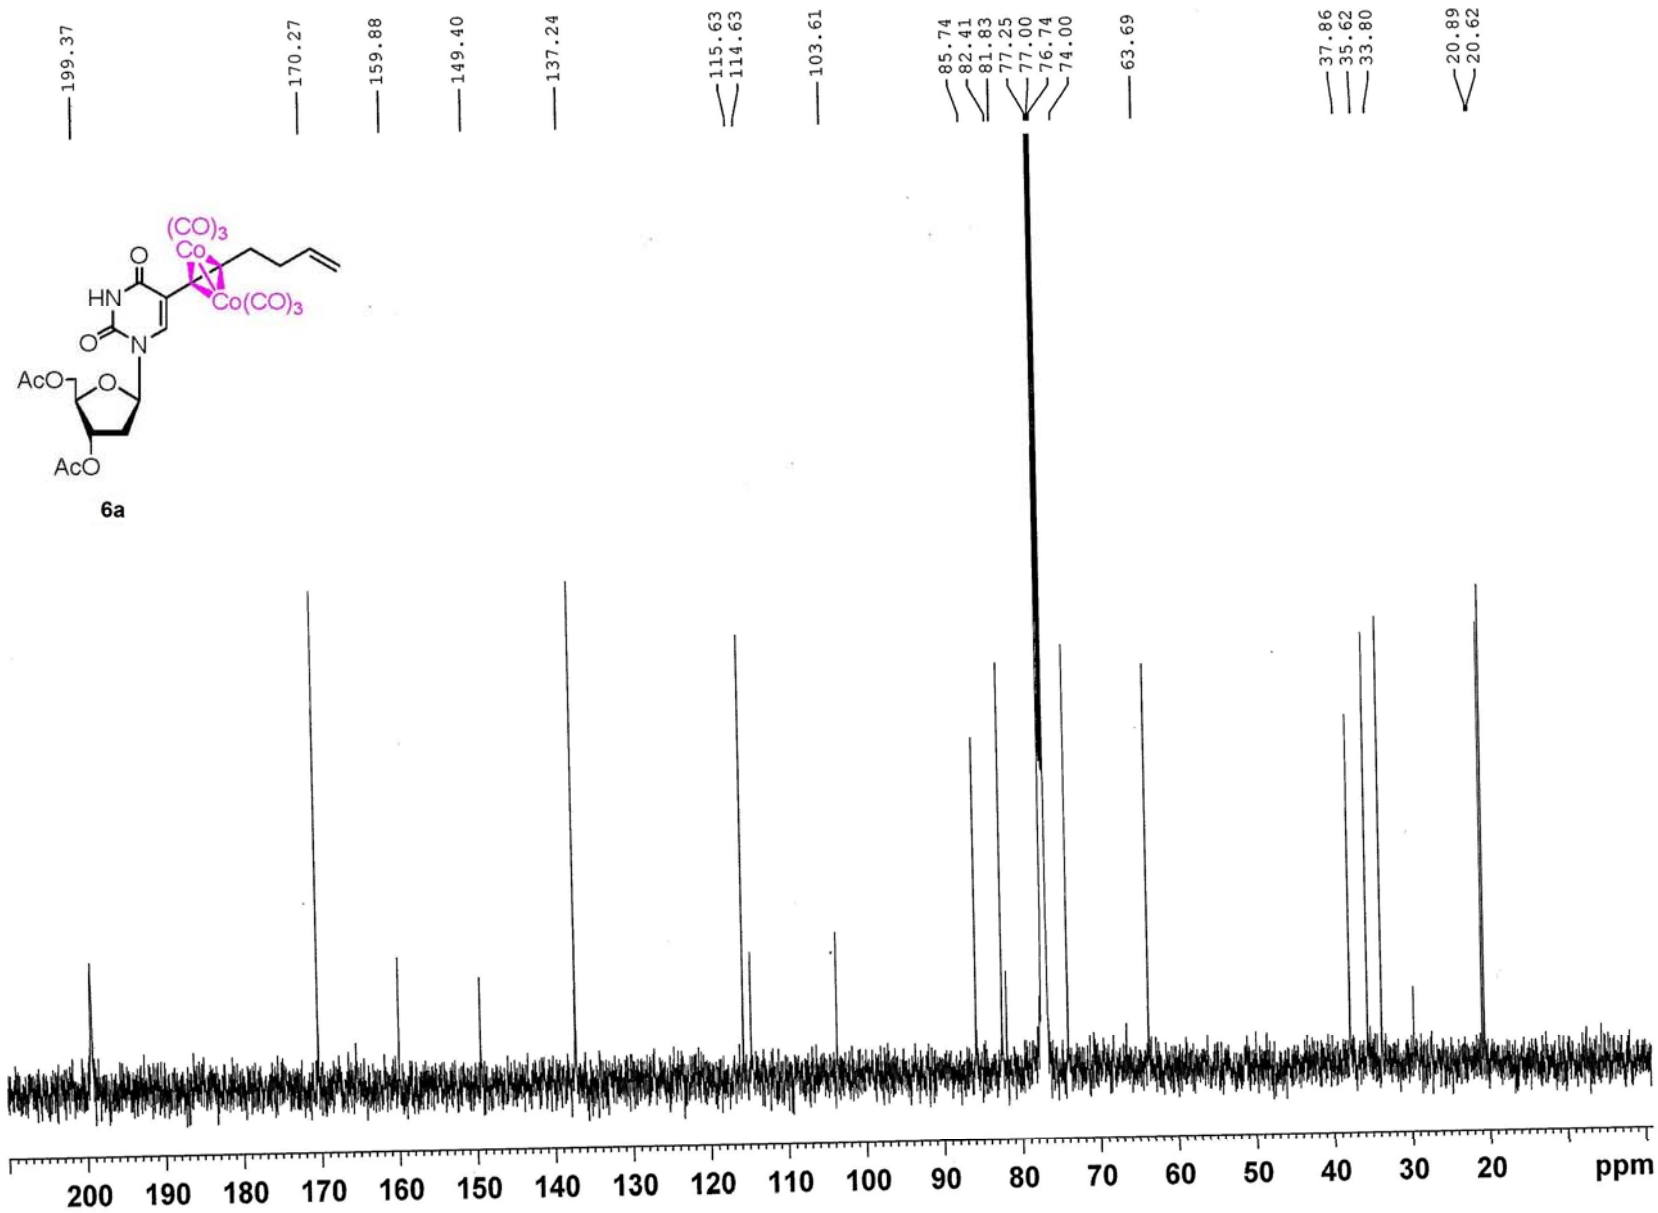

<sup>1</sup>H NMR spectrum for **6b** (CDCl<sub>3</sub>)

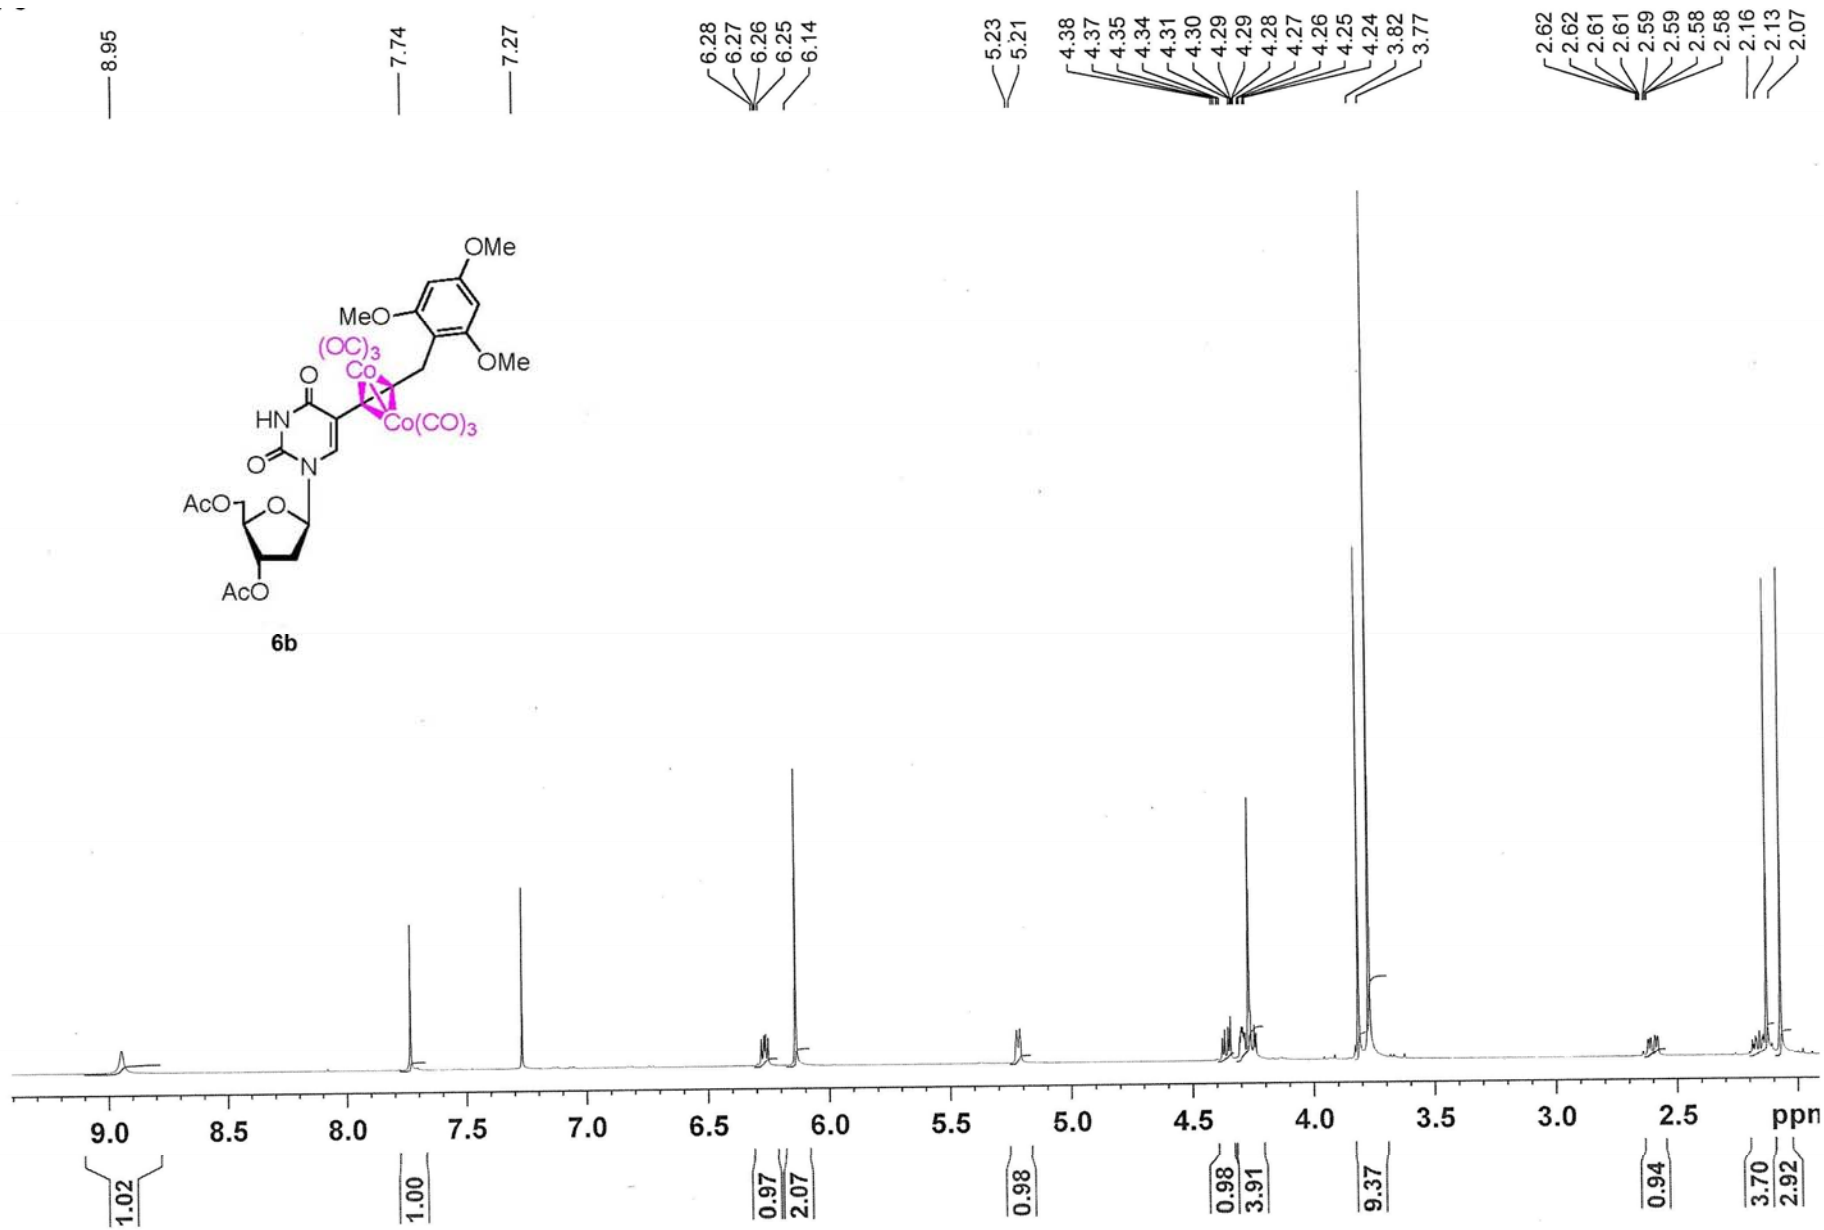

$^{13}\text{C}$  NMR spectrum for **6b** ( $\text{CDCl}_3$ )

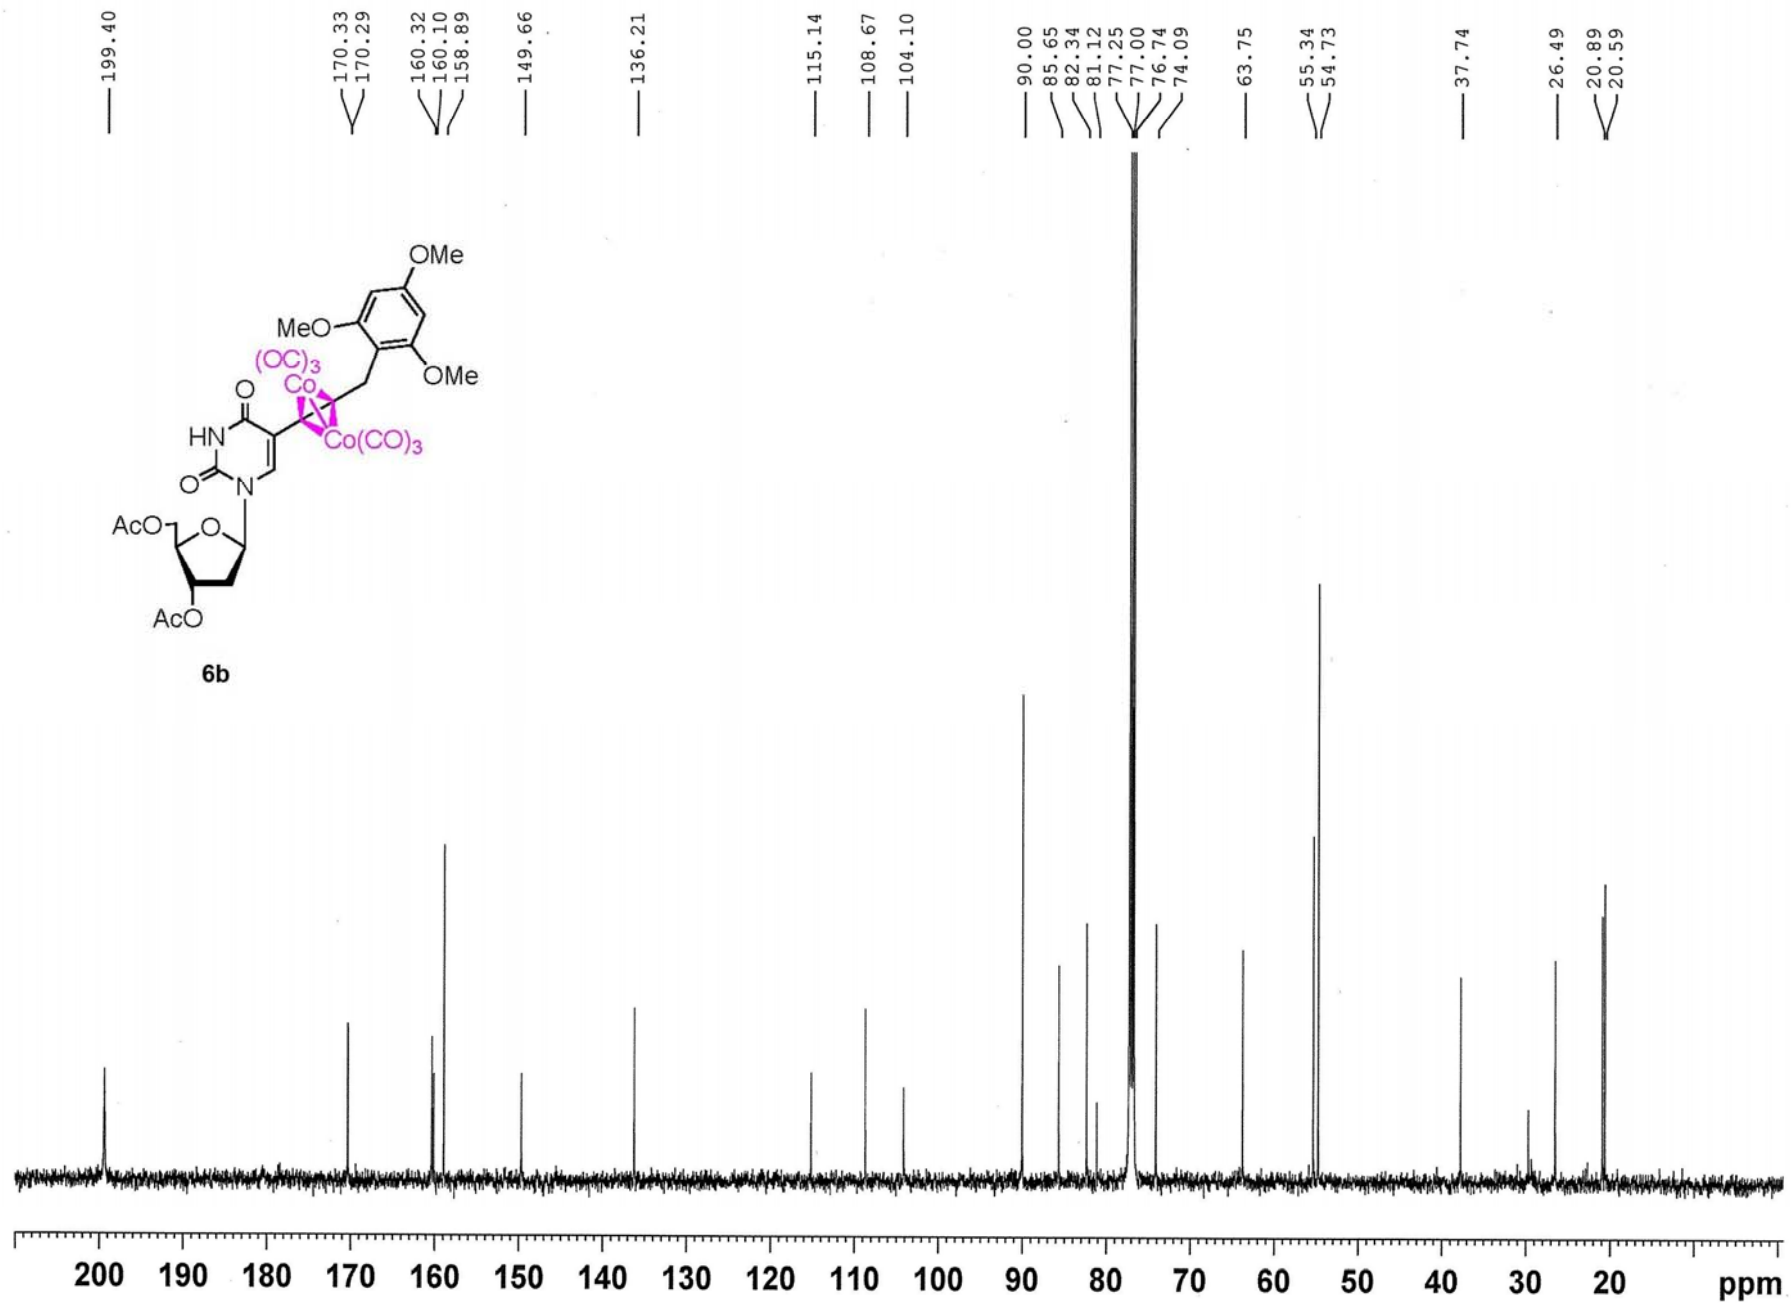

<sup>1</sup>H NMR spectrum for **6c** (CDCl<sub>3</sub>)

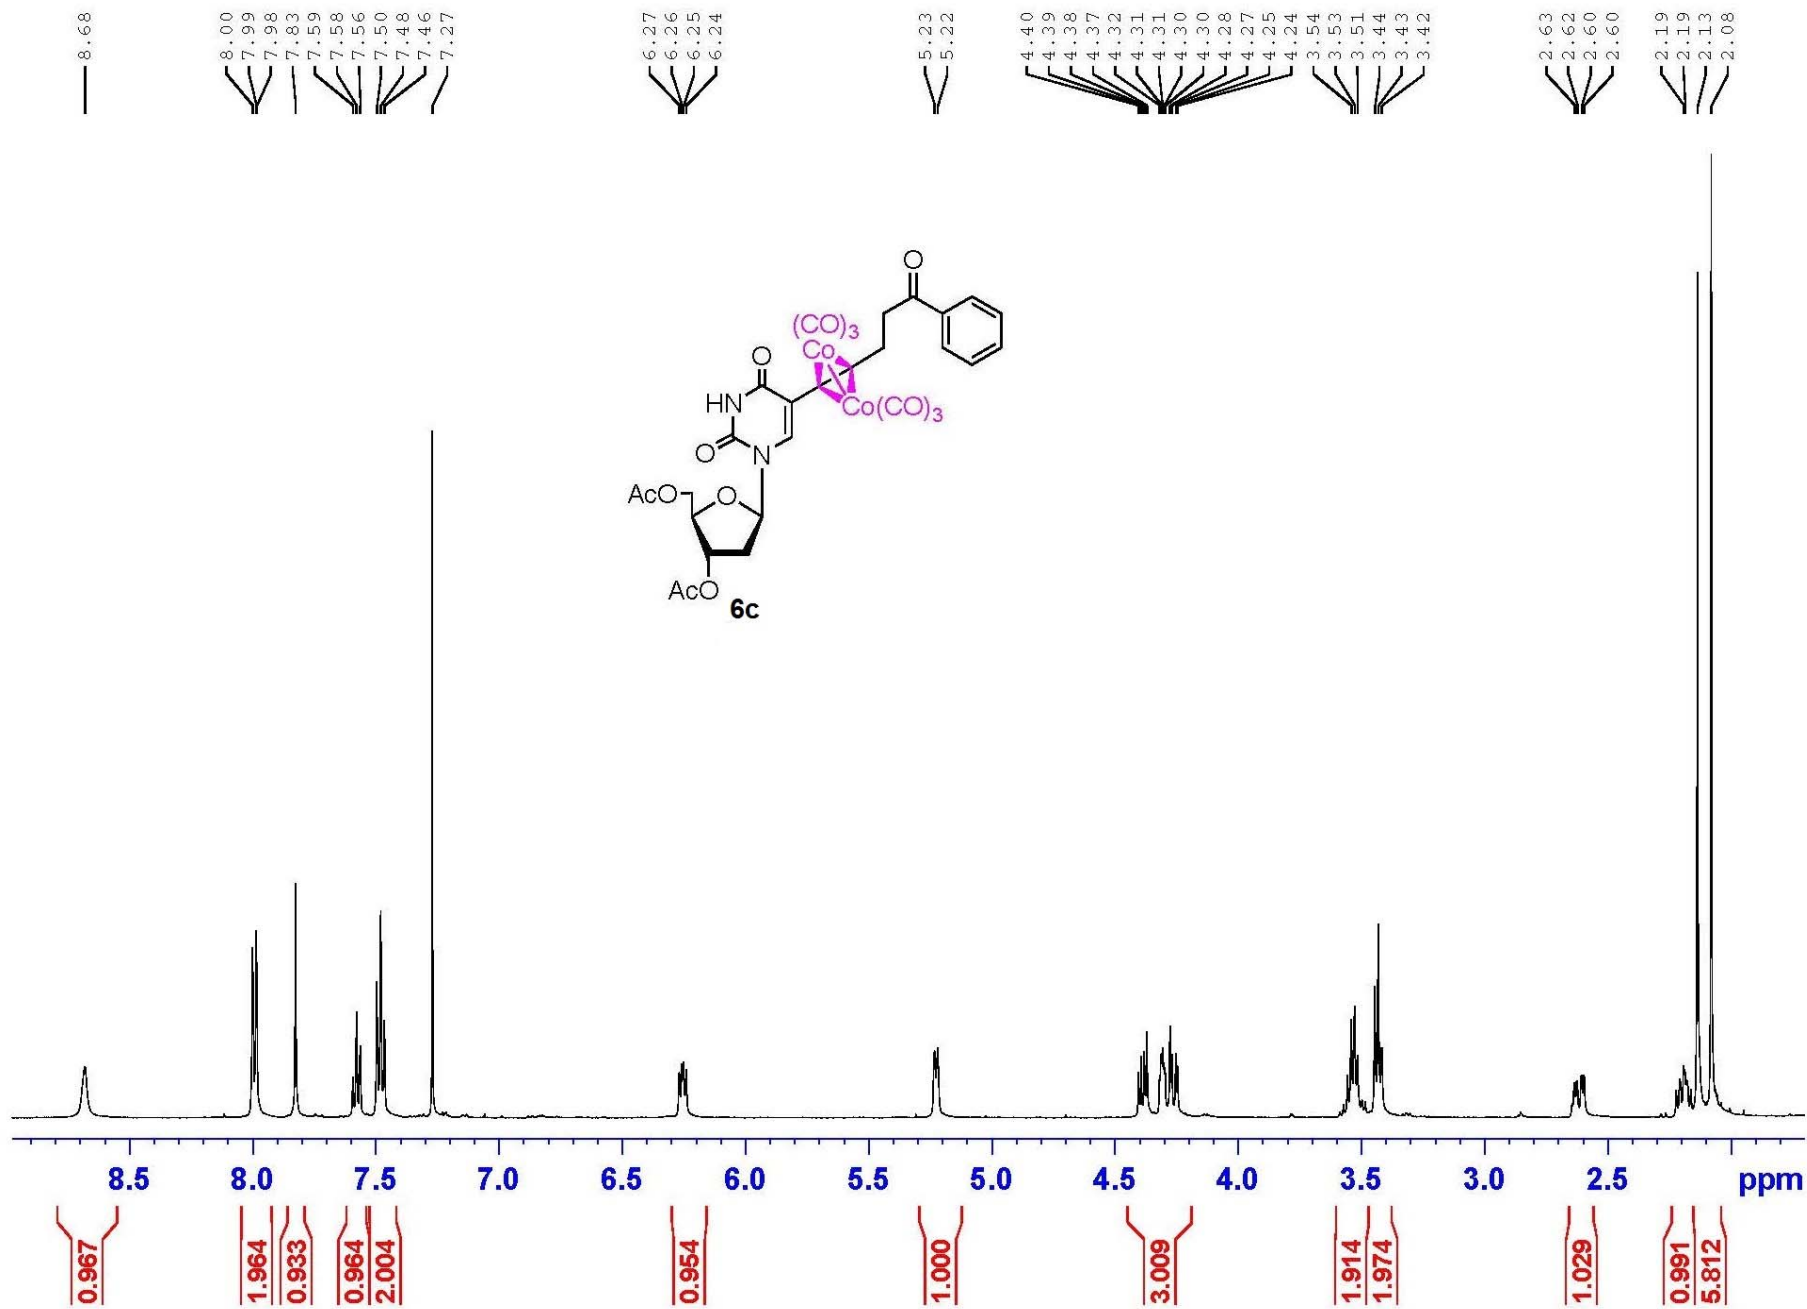

$^{13}\text{C}$  NMR spectrum for **6c** ( $\text{CDCl}_3$ )

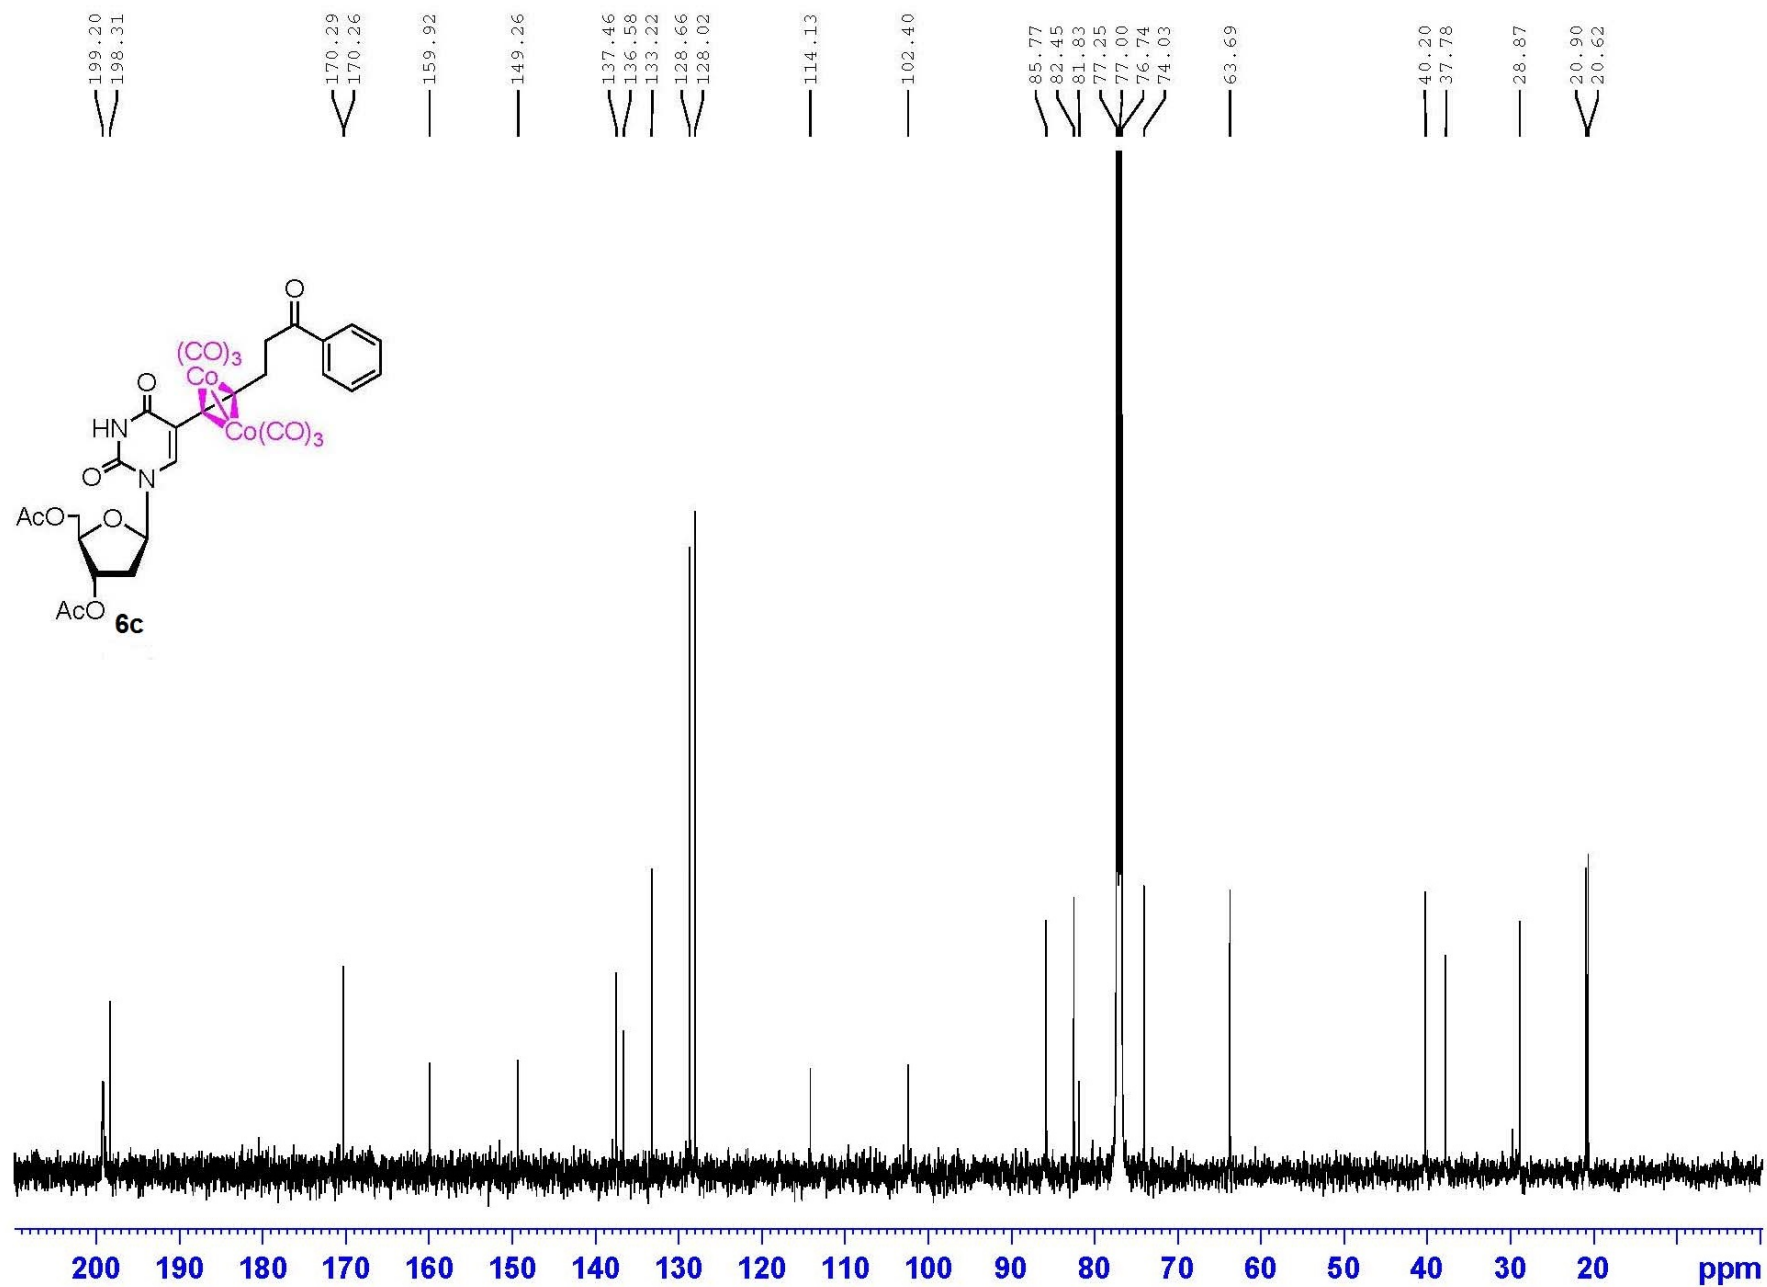



<sup>1</sup>H NMR spectrum for **7a** (CDCl<sub>3</sub>)

8.602

7.545

7.270

6.009

5.991

5.950

5.927

5.893

5.367

5.348

5.339

5.328

5.173

5.116

5.074

5.040

4.381

3.191

3.166

3.138

2.465

2.441

2.415

2.392

2.155

2.126

2.103

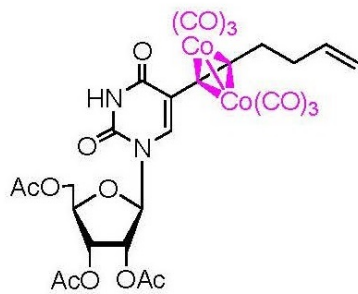

**7a**

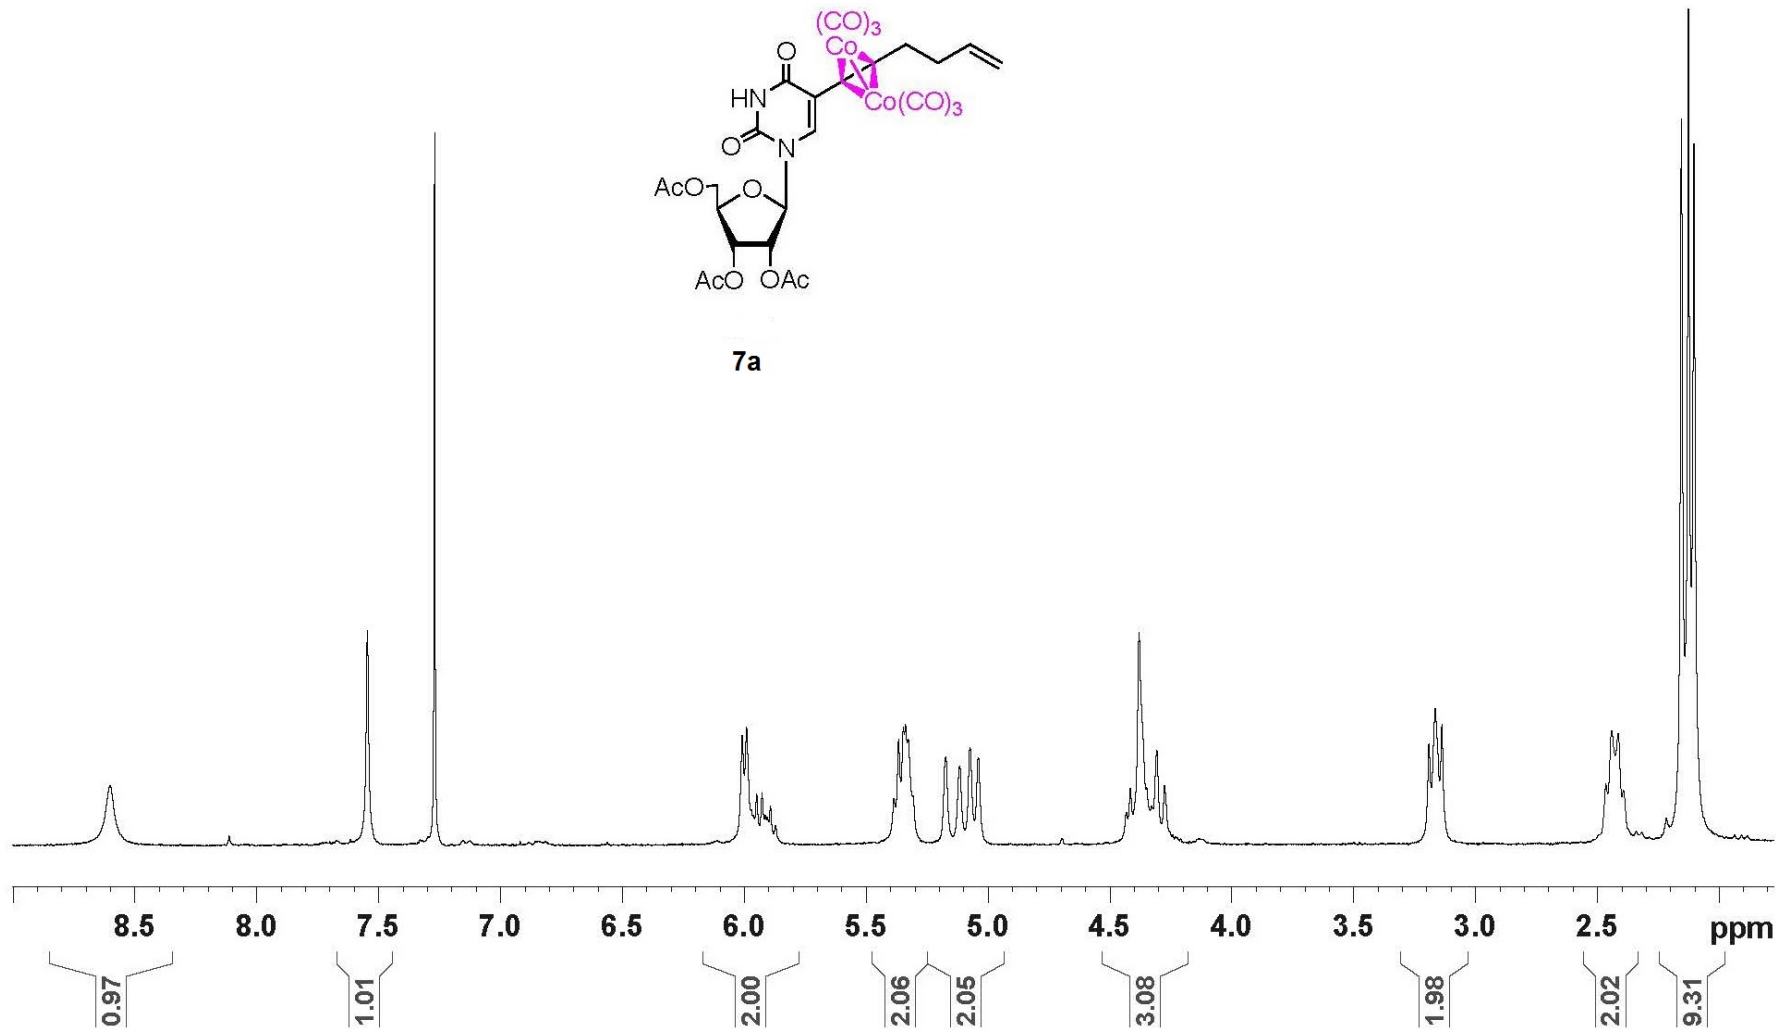

$^{13}\text{C}$  NMR spectrum for **7a** ( $\text{CDCl}_3$ )

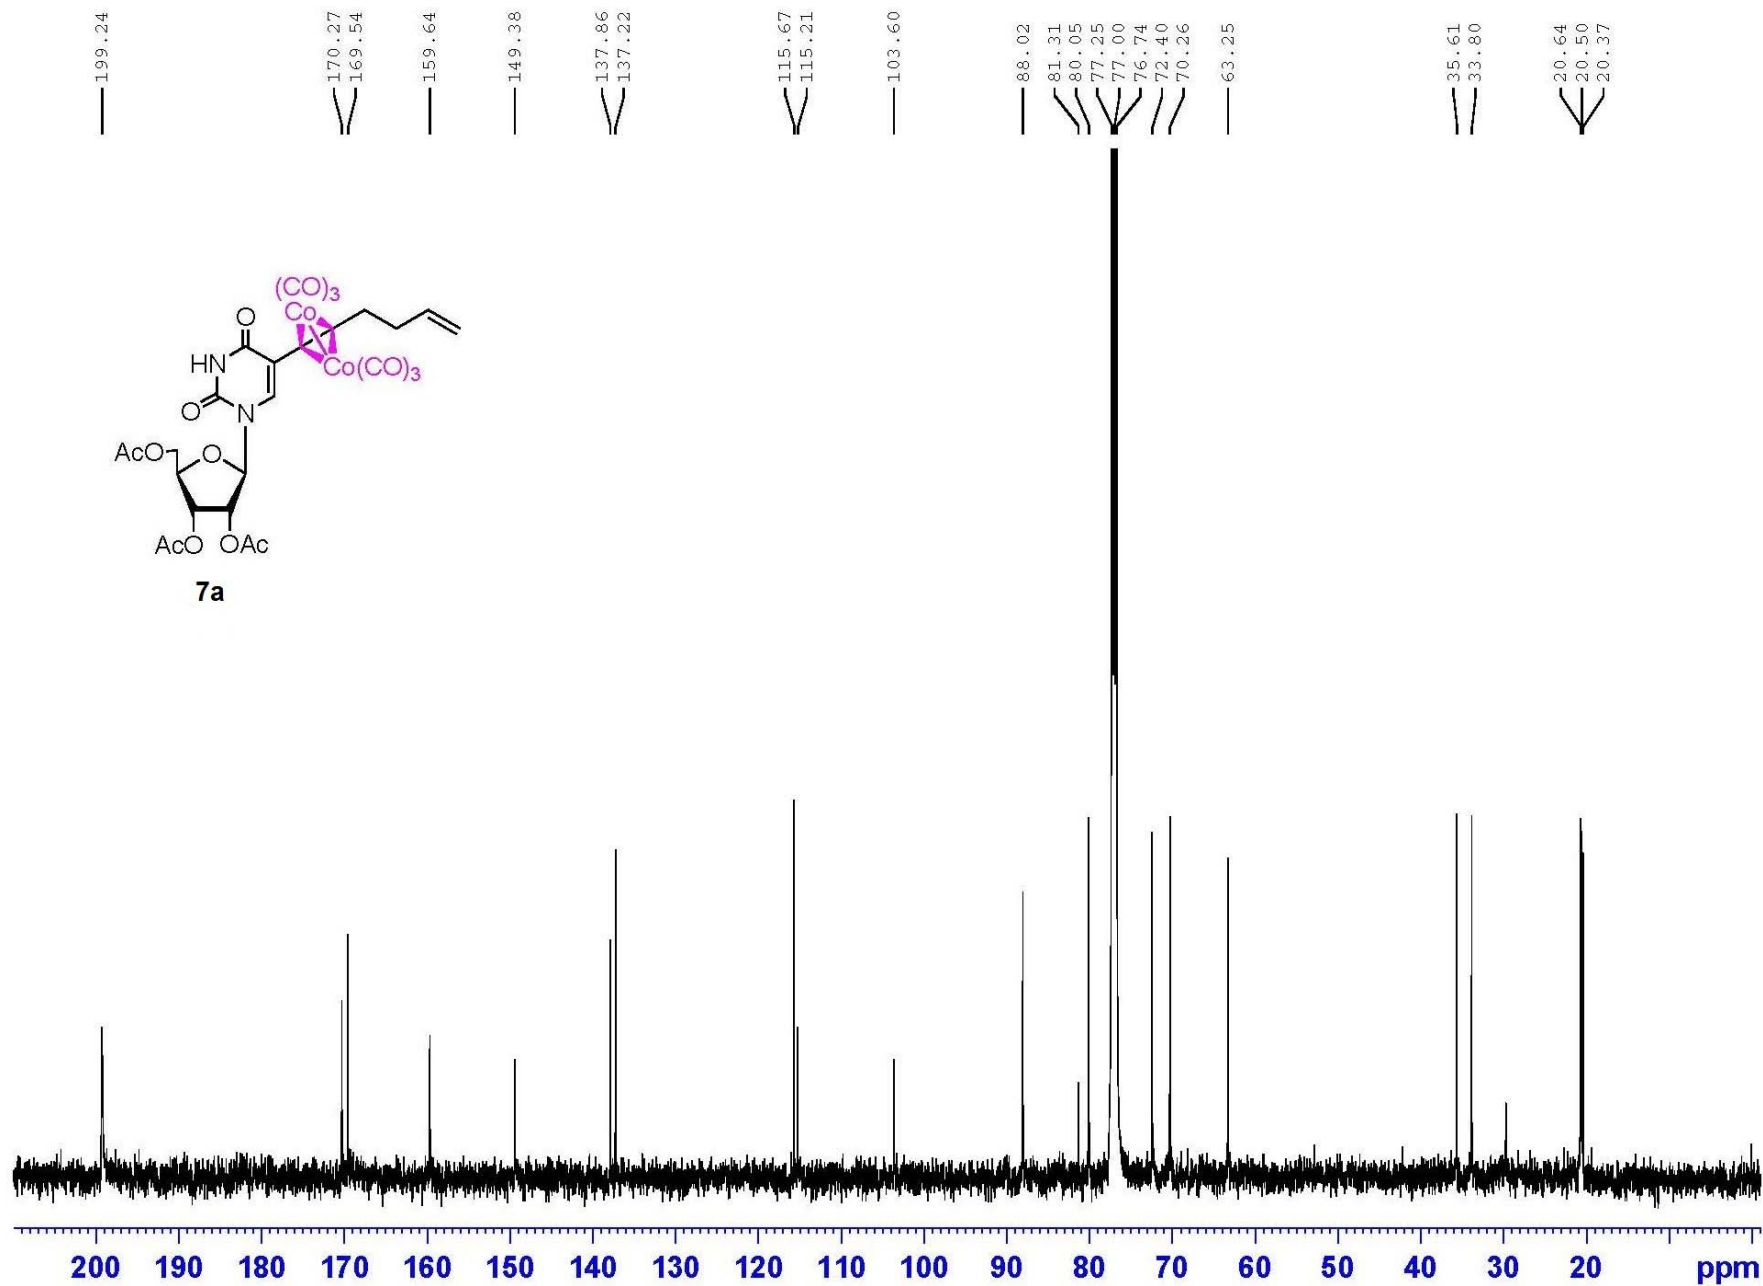

<sup>1</sup>H NMR spectrum for **7b** (CDCl<sub>3</sub>)

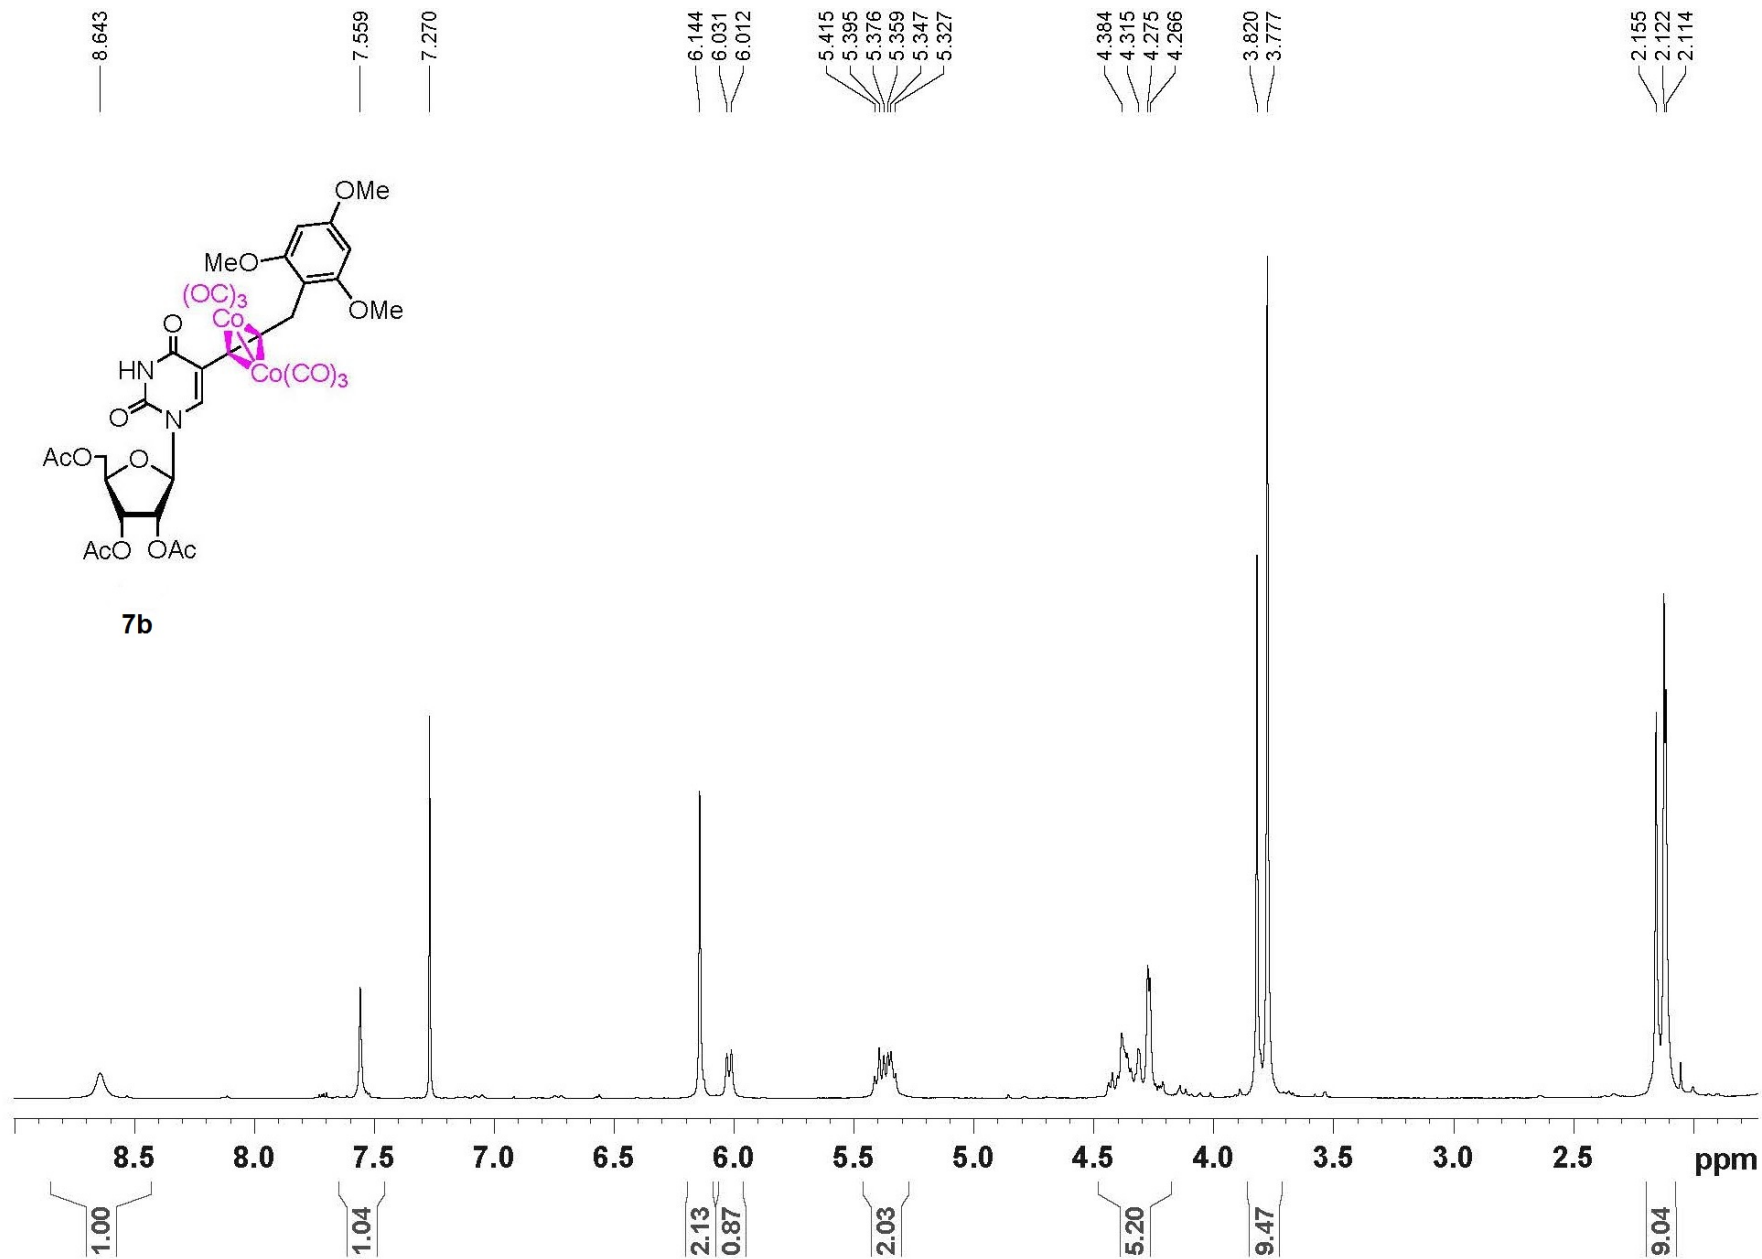

$^{13}\text{C}$  NMR spectrum for **7b** ( $\text{CDCl}_3$ )

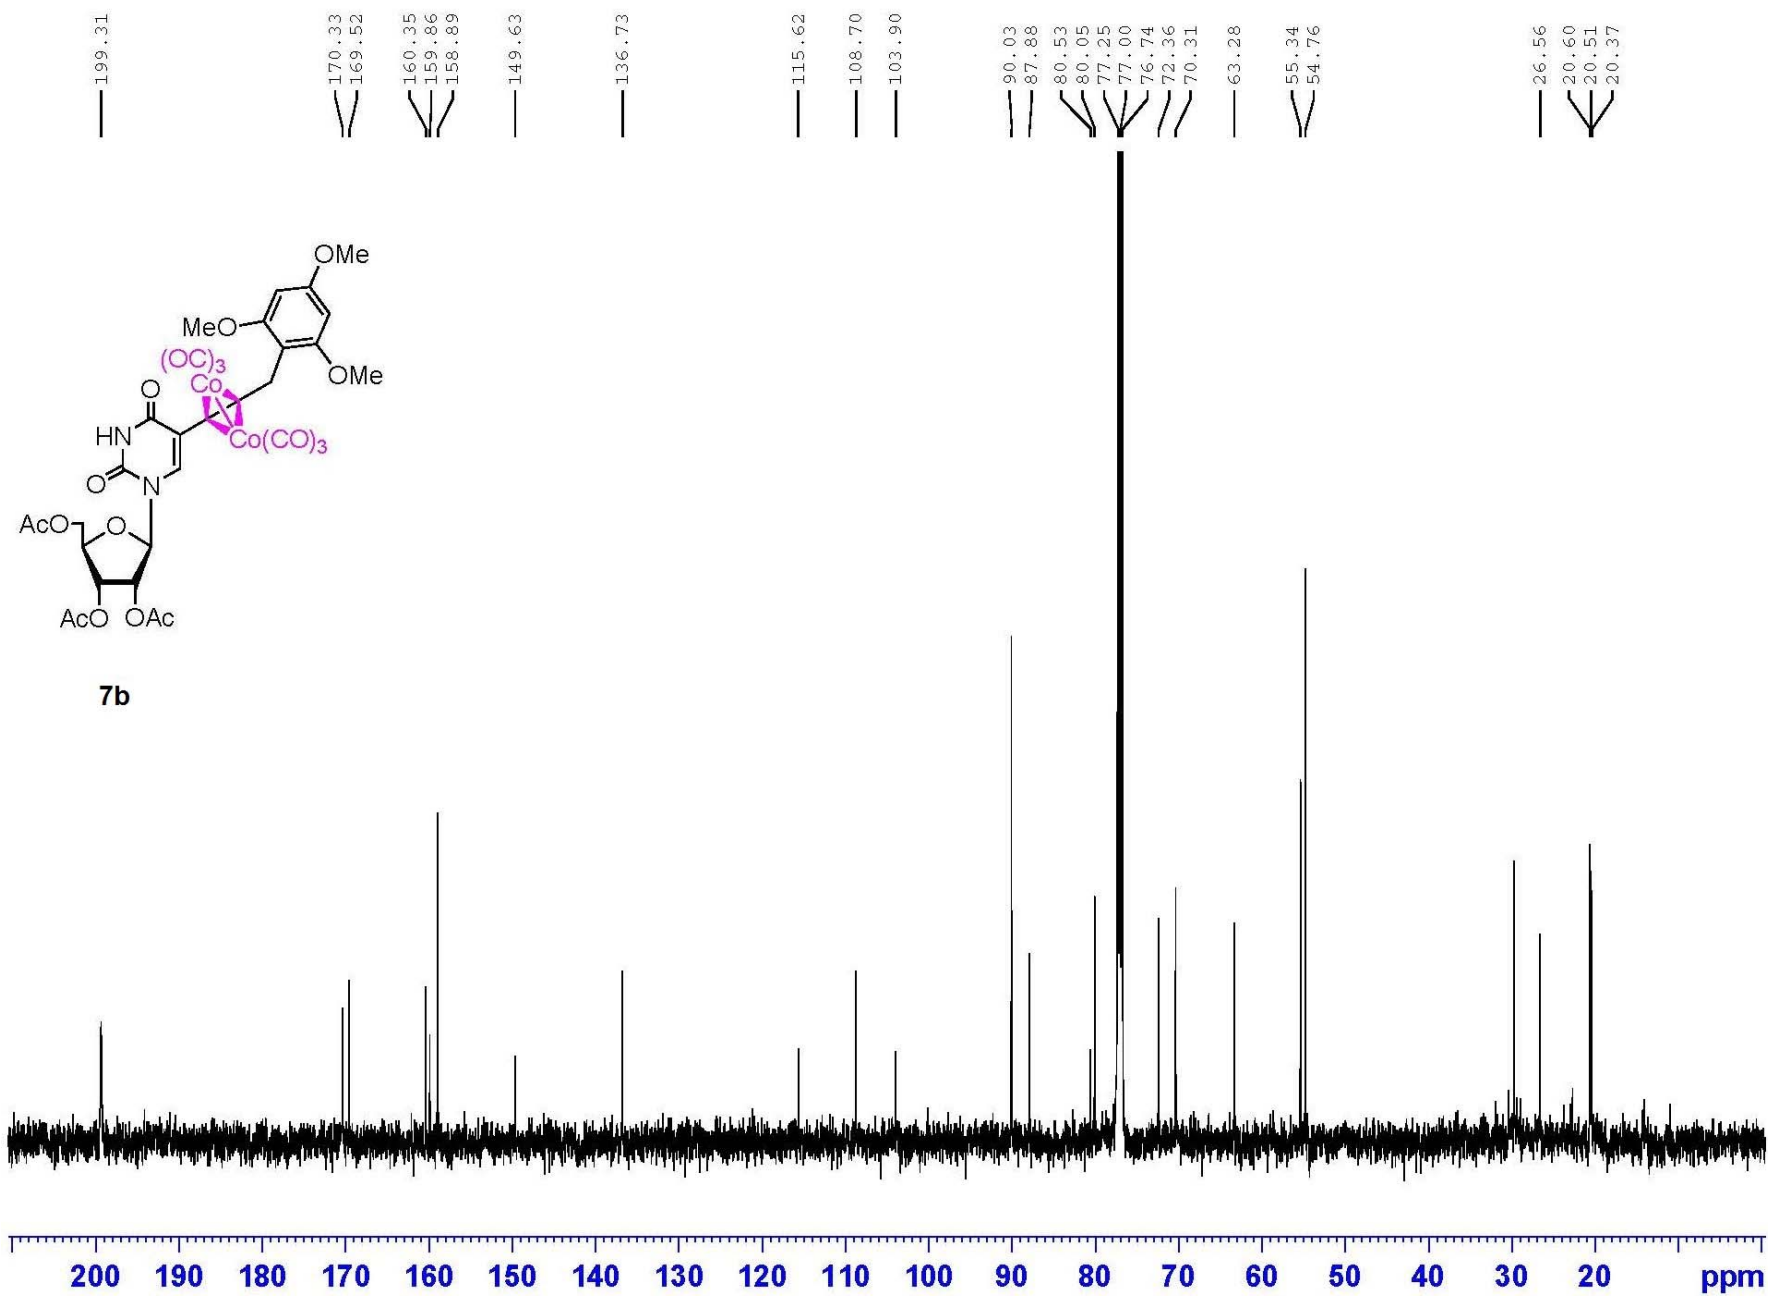

<sup>1</sup>H NMR spectrum for **7d** (CDCl<sub>3</sub>)

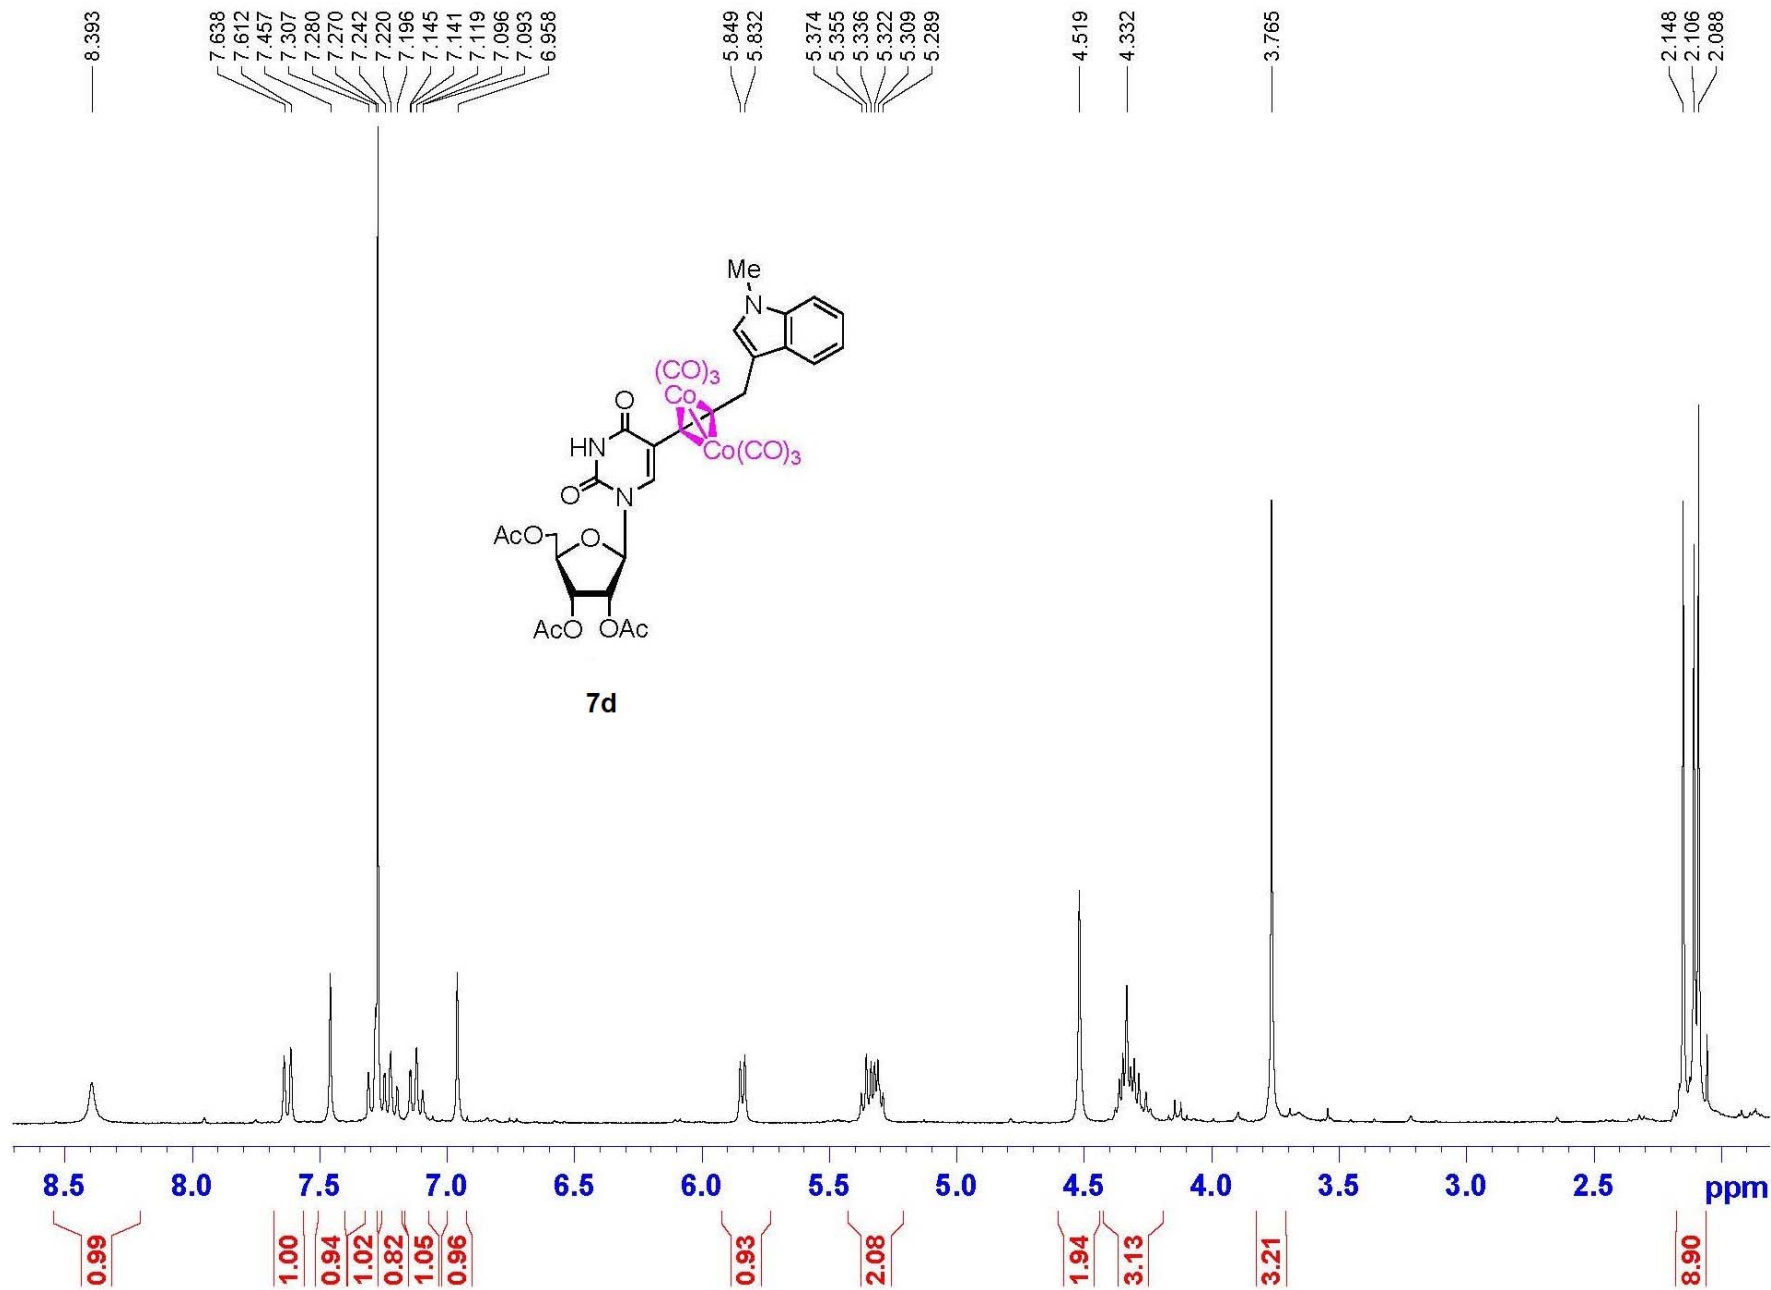

$^{13}\text{C}$  NMR spectrum for **7d** ( $\text{CDCl}_3$ )

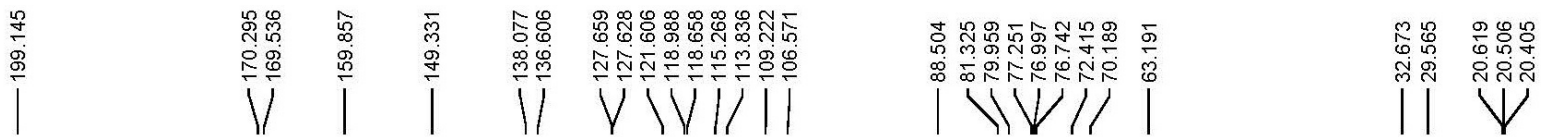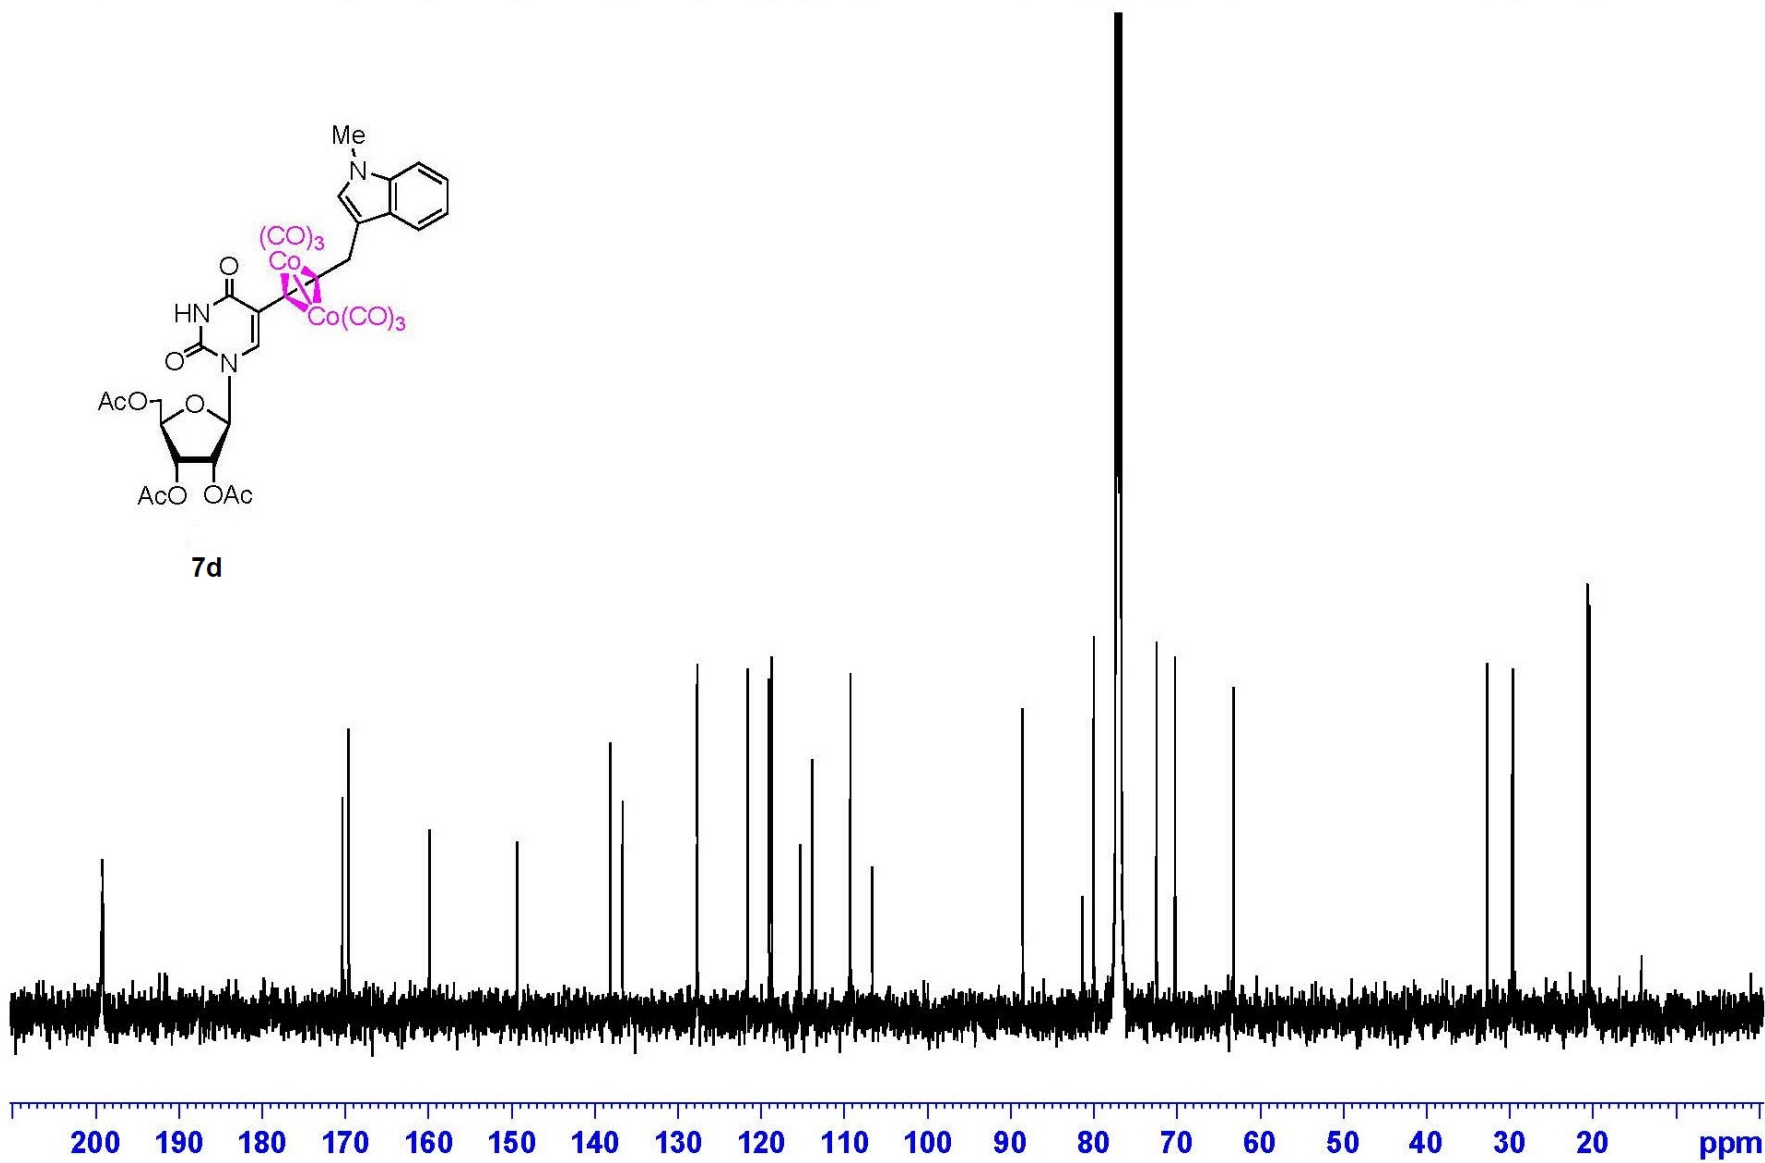

Supplement: Beilstein_J_Org_Chem-16-01-s001.pdf [file Beilstein_J_Org_Chem-16-01-s001.pdf]
